# Supplementary material for: Docking-based computational analysis of guava ( Psidium guajava ) leaves derived bioactive compounds as a coagulation factor IXa inhibitor
Source: Royal Society of Chemistry journal article supplement (doi:10.1039/d4ra04709e), 2024-01-01
Supplement: d4ra04709e1.pdf [file d4ra04709e1.pdf]

## SUPPLEMENTARY FILE

# **Docking-Based Computational Analysis of Guava (*Psidium guajava*) Leaves Derived Bioactive Compounds as Coagulation Factor IXa Inhibitor**

De Luna, Joseph  
Gonzales Shanahi Chelledie  
Nuqui, Jimuel Jan

Department of Chemistry, Technological University of the Philippines - Manila

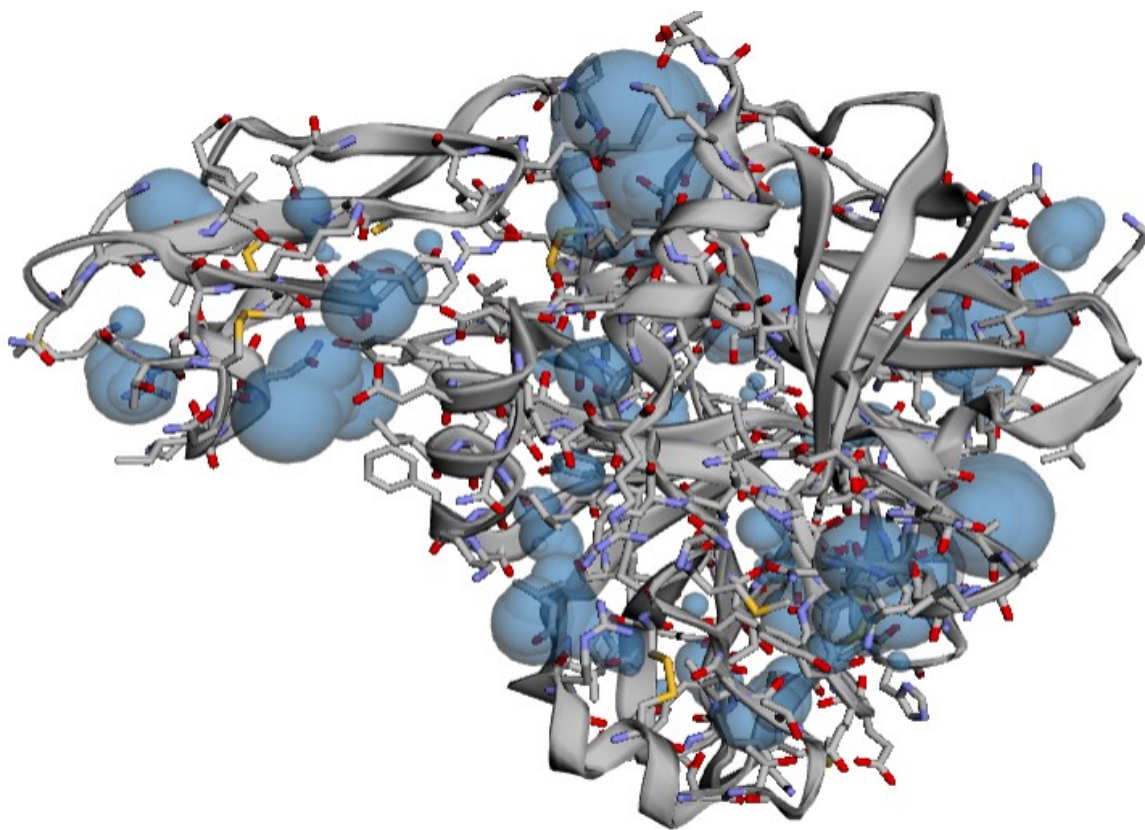

**Figure S1.** *Structural Representation of Identified CFIXa Active Sites*

**Table S1.** *Characteristic of All CFIXa Active Sites*

| Active Site ID | Area (Å <sup>2</sup> ) | Volume (Å <sup>3</sup> ) | Active Site ID | Area (Å <sup>2</sup> ) | Volume (Å <sup>3</sup> ) | Active Site ID | Area (Å <sup>2</sup> ) | Volume (Å <sup>3</sup> ) |
|----------------|------------------------|--------------------------|----------------|------------------------|--------------------------|----------------|------------------------|--------------------------|
| 1              | 215.899                | 128.236                  | 15             | 15.795                 | 2.932                    | 29             | 1.052                  | 0.037                    |
| 2              | 122.970                | 49.494                   | 16             | 15.658                 | 2.191                    | 30             | 0.814                  | 0.026                    |
| 3              | 90.078                 | 45.053                   | 17             | 15.300                 | 2.035                    | 31             | 0.381                  | 0.024                    |
| 4              | 46.643                 | 29.920                   | 18             | 5.682                  | 1.332                    | 32             | 0.476                  | 0.013                    |
| 5              | 55.432                 | 25.515                   | 19             | 8.210                  | 0.866                    | 33             | 0.445                  | 0.011                    |
| 6              | 44.564                 | 16.115                   | 20             | 5.331                  | 0.485                    | 34             | 0.374                  | 0.009                    |
| 7              | 61.362                 | 15.776                   | 21             | 3.829                  | 0.446                    | 35             | 0.382                  | 0.007                    |
| 8              | 44.347                 | 7.487                    | 22             | 5.476                  | 0.443                    | 36             | 0.378                  | 0.006                    |
| 9              | 19.565                 | 6.010                    | 23             | 4.648                  | 0.426                    | 37             | 0.244                  | 0.005                    |
| 10             | 25.308                 | 5.975                    | 24             | 3.502                  | 0.282                    | 38             | 0.198                  | 0.004                    |
| 11             | 18.459                 | 5.680                    | 25             | 2.816                  | 0.257                    | 39             | 0.094                  | 0.001                    |
| 12             | 23.415                 | 4.408                    | 26             | 1.059                  | 0.114                    | 40             | 0.005                  | 0.000                    |
| 13             | 8.783                  | 4.150                    | 27             | 2.275                  | 0.091                    | 41             | 0.003                  | 0.000                    |
| 14             | 11.694                 | 3.888                    | 28             | 1.258                  | 0.044                    | 42             | 0.011                  | 0.000                    |

**Table S2.** Coagulation Factor IXa Chosen Active Sites Information

| Active Site ID | Area (Å <sup>2</sup> ) | Volume (Å <sup>3</sup> ) | Amino Acid | Atom | Bond    | Bond Length (Å) | Amino Acid | Atom     | Bond  | Bond Length (Å) |
|----------------|------------------------|--------------------------|------------|------|---------|-----------------|------------|----------|-------|-----------------|
| II             | 122.970                | 49.494                   | H:HIS57    | NE2  | CD2-NE2 | 1.36914         | H:GLY216   | N        | N-CA  | 1.45804         |
|                |                        |                          | H:TYR99    | CE1  | CE1-CZ  | 1.37854         |            | CA       |       |                 |
|                |                        |                          |            | OH   | CZ-OH   | 1.37181         |            | O        |       |                 |
|                |                        |                          | H:ASP189   | CG   | CG-OD1  | 1.25708         | H:GLU217   | N        | N-CA  | 1.44962         |
|                |                        |                          |            | OD1  |         |                 |            | O        | C-O   | 1.24217         |
|                |                        |                          |            | OD2  | CG-OD2  | 1.27266         |            | H:GLU219 | O     | C-O             |
|                |                        |                          | H:SER190   | C    | C-O     | 1.22405         | H:CYS220   | CA       | CA-CB | 1.52297         |
|                |                        |                          |            | O    |         |                 |            | SG       | CB-SG | 1.79269         |
|                |                        |                          |            | CB   | CB-OG   | 1.41759         | H:ALA221   | N        | N-CA  | 1.45148         |
|                |                        |                          |            | OG   |         |                 |            | CA       |       |                 |
|                |                        |                          | H:CYS191   | N    | N-CA    | 1.4671          | H:MET221   | N        | N-CA  | 1.45196         |
|                |                        |                          |            | CA   |         |                 |            | C        | C-O   | 1.24155         |
|                |                        |                          |            | C    | C-O     | 1.22405         | H:LYS224   | O        |       |                 |
|                |                        |                          |            | O    |         |                 |            | CB       |       |                 |
|                |                        |                          | H:GLN192   | N    | N-CA    | 1.47061         | H:TYR225   | N        | N-CA  | 1.4459          |
|                |                        |                          |            | CA   |         |                 |            | CA       |       |                 |
| CG             | CG-CD                  | 1.50074                  |            | C    | C-O     | 1.19949         |            |          |       |                 |
| CD             |                        |                          |            | O    |         |                 |            |          |       |                 |

|     |        |         |   |          |         |         |          |          |      |         |         |  |
|-----|--------|---------|---|----------|---------|---------|----------|----------|------|---------|---------|--|
|     |        |         |   | NE2      | CD-NE2  | 1.33314 | H:GLY226 | CA       | CA-C | 1.51956 |         |  |
|     |        |         |   | H:SER195 | OG      | CB-OG   | 1.41511  | H:ILE227 | N    | N-CA    | 1.45471 |  |
|     |        |         |   | H:ILE213 | CG2     | CB-CG1  | 1.51821  |          | O    | C-O     | 1.24276 |  |
|     |        |         |   | H:SER214 | C       | C-O     | 1.24355  | H:TYR228 | CE2  | CE2-CZ  | 1.39065 |  |
|     |        |         |   |          | O       |         |          |          | CZ   |         |         |  |
|     |        |         |   | H:TRP215 | N       | N-CA    | 1.48185  |          |      |         |         |  |
|     |        |         |   |          | CA      |         |          |          |      |         |         |  |
|     |        |         |   | C        | C-O     | 1.22822 |          |          |      |         |         |  |
|     |        |         |   | O        |         |         |          |          |      |         |         |  |
|     |        |         |   | CB       | CA-CB   | 1.55715 |          |          |      |         |         |  |
|     |        |         |   | H:VAL32  | CG1     | CB-CG1  | 1.51508  | H:THR76  | N    | N-CA    | 1.44632 |  |
|     |        |         |   |          | CG2     | CB-CG2  | 1.50644  |          | CA   |         |         |  |
|     |        |         |   | H:ASN34  | OD1     | CD-OD1  | 1.26025  |          | OG1  | CB-OG1  | 1.43909 |  |
|     |        |         |   |          | ND2     | CG-ND2  | 1.31645  |          | CG2  | CB-CG2  | 1.51245 |  |
|     |        |         |   | H:ASP39  | CB      | CB-CG   | 1.52305  | H:GLU80  | CD   | CG-CD   | 1.51131 |  |
|     |        |         |   |          | CG      |         |          |          | OE1  | CD-OE1  | 1.25032 |  |
|     |        |         |   |          | OD2     | CG-OD2  | 1.23287  |          | OE2  | CD-OE2  | 1.24772 |  |
|     |        |         |   | H:ALA40  | CB      | CA-CB   | 1.54078  | H:LYS82  | CE   | CE-NZ   | 1.49946 |  |
|     |        |         |   | H:VAL67  | CG1     | CB-CG1  | 1.51674  |          | NZ   |         |         |  |
|     |        |         |   |          | CG2     | CB-CG2  | 1.52517  |          |      |         |         |  |
| III | 90.078 | 45.053  |   | H:GLU70  | OE1     | CD-OE1  | 1.2454   |          |      |         |         |  |
|     |        |         |   |          | CA      | CA-C    | 1.56548  |          |      |         |         |  |
|     |        |         |   |          | O       | C-O     | 1.22965  |          |      |         |         |  |
|     |        |         |   |          | H:ILE73 | CB      | CB-CG2   | 1.51392  |      |         |         |  |
|     |        |         |   |          |         | CG2     |          |          |      |         |         |  |
|     |        |         |   |          |         | CD1     | CG1-CD1  | 1.52142  |      |         |         |  |
|     |        |         |   |          |         | CD      | CG-CD    | 1.51932  |      |         |         |  |
|     |        |         |   |          | H:GLU74 | OE1     | CD-OE1   | 1.25042  |      |         |         |  |
|     |        |         |   |          |         | OE2     | CD-OE2   | 1.25686  |      |         |         |  |
|     |        |         |   |          |         | N       | N-CA     | 1.46232  |      |         |         |  |
|     |        | H:GLU75 | C | C-O      | 1.2445  |         |          |          |      |         |         |  |
|     |        |         | O |          |         |         |          |          |      |         |         |  |
| V   | 55.432 | 25.515  |   | H:ASP125 | OD2     | CG-OD2  | 1.25402  | L:CYS88  | C    | C-O     | 1.21921 |  |
|     |        |         |   | H:GLU127 | CD      | CD-CE   | 1.50033  |          | O    |         |         |  |

|           |         |         |         |          |         |         |         |
|-----------|---------|---------|---------|----------|---------|---------|---------|
|           | OE1     | CD-OE1  | 1.25442 |          | CB      | CA-CB   | 1.51823 |
|           | OE2     | CD-OE2  | 1.25241 |          | N       | N-CA    | 1.46728 |
| H:TYR128  | CD2     | CD2-CE2 | 1.39727 | L:ASN89  | CA      |         |         |
|           | CE2     |         |         |          | OD1     | CG-OD1  | 1.2463  |
|           | CZ      | CZ-OH   | 1.37223 |          | L:ASN92 | OD1     | CG-OD1  |
| OH        | L:PHE98 |         |         | CB       | CA-CB   | 1.53733 |         |
| H:ILE129B | CD1     | CG1-CD1 | 1.57649 | L:CYS99  | O       | C-O     | 1.2262  |
|           |         |         |         | L:LYS100 | CG      | CG-CD   | 1.51948 |

**Table S3.** Extraction Set-Ups Percent Yield

| Set-up | Solvent     | Leaf Texture | Dry Sample Weight (g) | Extract Weight (g) | Percent Yield (%) |
|--------|-------------|--------------|-----------------------|--------------------|-------------------|
| A      | 30% Ethanol | Powdered     | 50 g                  | 15.83              | 31.66             |
| B      | 95% Ethanol | Powdered     | 25 g                  | 3.4                | 13.6              |
| C      | 95% Ethanol | Shredded     | 200 g                 | 78.541             | 39.27             |

### Computation:

Extract Weight (g) = Flask w/ Crude Extract Weight (g) - Empty Flask Weight (g)

$$\text{Percent Yield (\%)} = \frac{\text{Extract Weight (g)}}{\text{Dry Sample Weight (g)}} \times 100$$

### 30% Ethanol | Powdered

*ExtractWeight(g) = Flaskw/CrudeExtractWeight(g) – EmptyFlaskWeight(g)*

$$= 403.61 \text{ g} - 387.78 \text{ g} = 15.83 \text{ g}$$

$$\text{Percent Yield (\%)} = \frac{\text{Extract Weight (g)}}{\text{Dry Sample Weight (g)}} \times 100$$

$$= \frac{15.83 \text{ g}}{50 \text{ g}} \times 100 = 31.66\%$$

### 95% Ethanol | Powdered

$$\begin{aligned} \text{ExtractWeight}(g) &= \text{Flaskw/CrudeExtractWeight}(g) - \text{EmptyFlaskWeight}(g) \\ &= 391.18 \text{ g} - 387.78 \text{ g} = 3.4 \text{ g} \end{aligned}$$

$$\begin{aligned} \text{Percent Yield (\%)} &= \frac{\text{Extract Weight (g)}}{\text{Dry Sample Weight (g)}} \times 100 \\ &= \frac{3.4 \text{ g}}{25 \text{ g}} \times 100 = 13.6\% \end{aligned}$$

### **95% Ethanol | Shredded**

$$\begin{aligned} \text{ExtractWeight}(g) &= \text{Flaskw/CrudeExtractWeight}(g) - \text{EmptyFlaskWeight}(g) \\ &= 186.26 \text{ g} - 107.719 \text{ g} = 78.541 \text{ g} \end{aligned}$$

$$\begin{aligned} \text{Percent Yield (\%)} &= \frac{\text{Extract Weight (g)}}{\text{Dry Sample Weight (g)}} \times 100 \\ &= \frac{78.541 \text{ g}}{200 \text{ g}} \times 100 = 39.271\% \end{aligned}$$

**Figure S2.** GC-MS Mass Spectra and Chromatogram

Spectrum Comparison

Spectrum1 #Data# UNK\_2232024\_3.qgd R.Time:3.910(Scan#:92)

MassPeaks:41

RawMode:Single 3.910(92) BasePeak:81.10(10000)

BG Mode:None Group 1 - Event 1

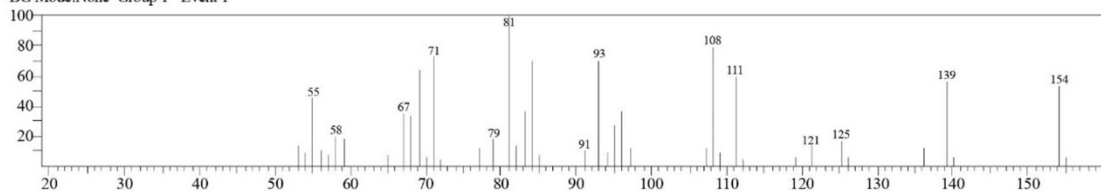

Spectrum2 #Library# NIST11s.lib Entry:9937 Formula:C10H18O CAS:470-82-6 MolWeight:154

MassPeaks:72 BasePeak:43.00(10000)

CompName:Eucalyptol SS Cineole SS 2-Oxabicyclo[2.2.2]octane, 1,3,3-trimethyl- SS p-Menthane, 1,8-epoxy- SS p-Cineole SS Cajepulol SS Cucalyptol SS Eucapur SS Terpan S

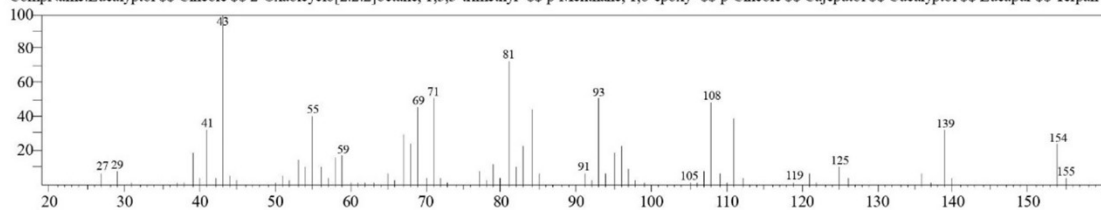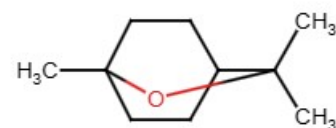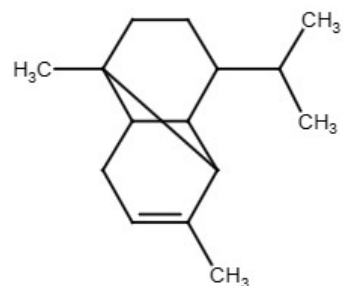

Spectrum Comparison

Spectrum1 #Data# UNK\_2232024\_3.qgd R.Time:8.630(Scan#:564)  
 MassPeaks:65  
 RawMode:Single 8.630(564) BasePeak:119.15(10000)  
 BG Mode:Averaged 8.520-8.740(553-575) Group 1 - Event 1

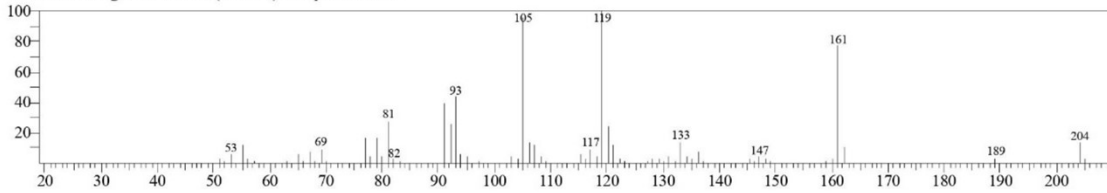

Spectrum2 #Library# NIST11s.lib Entry:18104 Formula:C15H24 CAS:3856-25-5 MolWeight:204  
 MassPeaks:118 BasePeak:119.00(10000)  
 CompName:Copaene SS Tricyclo[4.4.0.02,7]dec-3-ene, 1,3-dimethyl-8-(1-methylethyl)-, stereoisomer SS Tricyclo[4.4.0.02,7]dec-3-ene, 8-isopropyl-1,3-dimethyl-, (1R,2S,6S,7

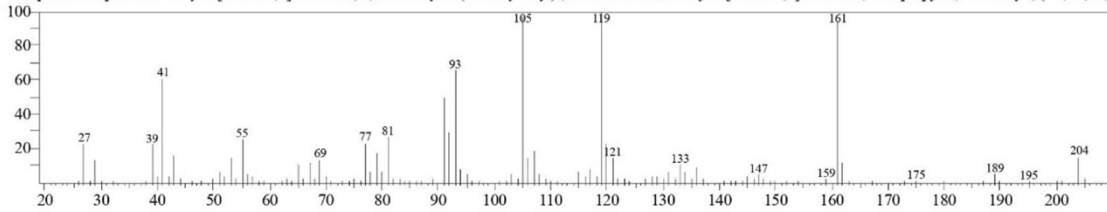

Spectrum Comparison

Spectrum1 #Data# UNK\_2232024\_3.qgd R.Time:9.260(Scan#:627)  
 MassPeaks:81  
 RawMode:Single 9.260(627) BasePeak:93.10(10000)  
 BG Mode:Averaged 9.180-9.360(619-637) Group 1 - Event 1

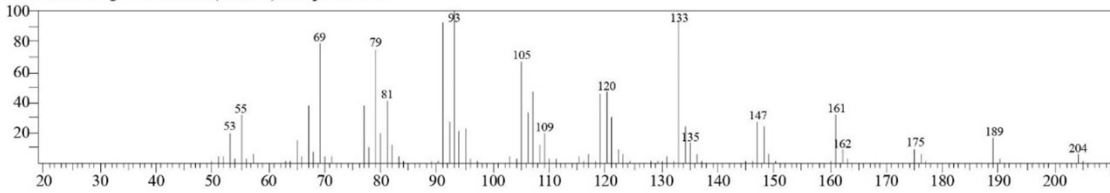

Spectrum2 #Library# NIST11s.lib Entry:18069 Formula:C15H24 CAS:87-44-5 MolWeight:204  
 MassPeaks:176 BasePeak:93.00(10000)  
 CompName:Caryophyllene SS Bicyclo[7.2.0]undec-4-ene, 4,11,11-trimethyl-8-methylene-, [1R-(1R\*,4E,9S\*)]- SS Bicyclo[7.2.0]undec-4-ene, 4,11,11-trimethyl-8-methylene-, (

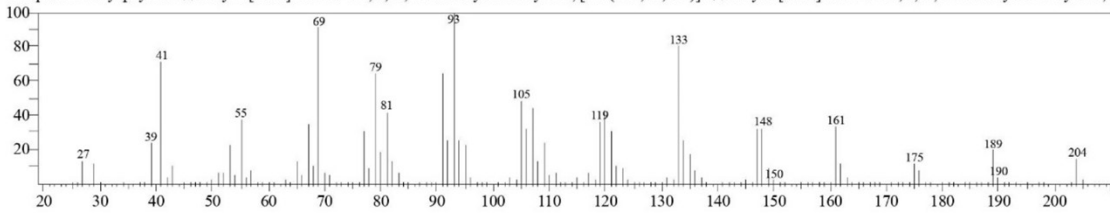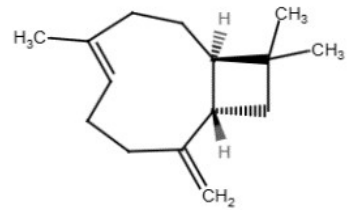



Spectrum Comparison

Spectrum1 #Data# UNK\_2232024\_3.qgd R.Time:9.620(Scan#:663)

MassPeaks:37

RawMode:Single 9.620(663) BasePeak:161.15(10000)

BG Mode:Averaged 9.560-9.660(657-667) Group 1 - Event 1

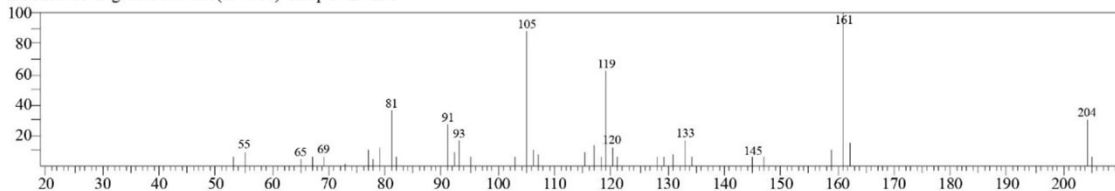

Spectrum2 #Library# NIST11s.lib Entry:18090 Formula:C15H24 CAS:17699-14-8 MolWeight:204

MassPeaks:99 BasePeak:105.00(10000)

CompName:.alpha.-Cubebene S5 1H-Cyclopenta[1,3]cyclopropa[1,2]benzene, 3a,3b,4,5,6,7-hexahydro-3,7-dimethyl-4-(1-methylethyl)-, [3aS-(3a.alpha.,3b.beta.,4.beta.,7.alpha.

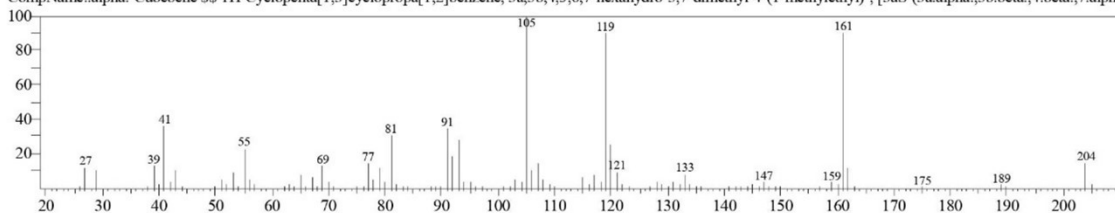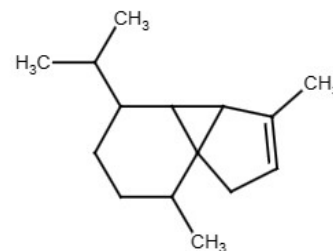

Spectrum Comparison

Spectrum1 #Data# UNK\_2232024\_3.qgd R.Time:9.720(Scan#:673)

MassPeaks:42

RawMode:Single 9.720(673) BasePeak:93.10(10000)

BG Mode:Averaged 9.680-9.800(669-681) Group 1 - Event 1

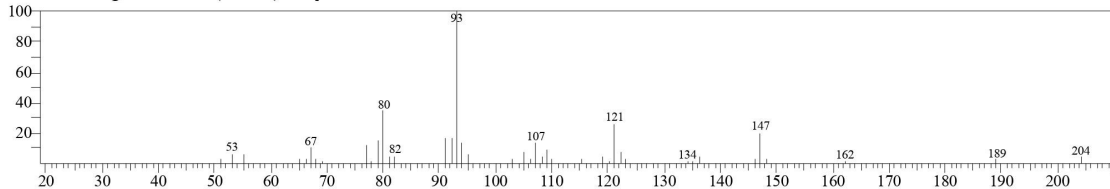

Spectrum2 #Library# NIST11s.lib Entry:18070 Formula:C15H24 CAS:6753-98-6 MolWeight:204

MassPeaks:70 BasePeak:93.00(10000)

CompName:Humulene S5 .alpha.-Caryophyllene S5 1,4,8-Cycloundecatriene, 2,6,6,9-tetramethyl-, (E,E,E)- S5 .alpha.-Humulene S5 Cycloundeca-1,4,8-triene,2,6,6,9-tetramethyl-

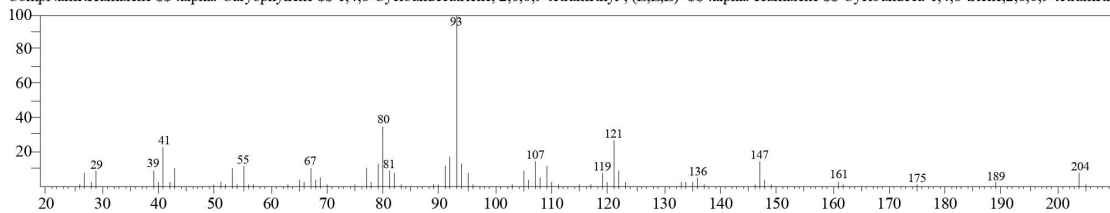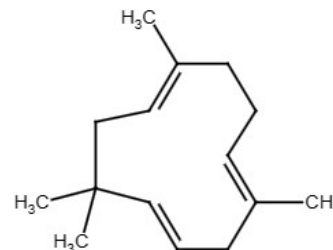

Spectrum Comparison

Spectrum1 #Data# UNK\_2232024\_3.qgd R.Time:9.920(Scan#:693)  
 MassPeaks:54  
 RawMode:Single 9.920(693) BasePeak:105.10(10000)  
 BG Mode:Averaged 9.880-10.000(689-701) Group 1 - Event 1

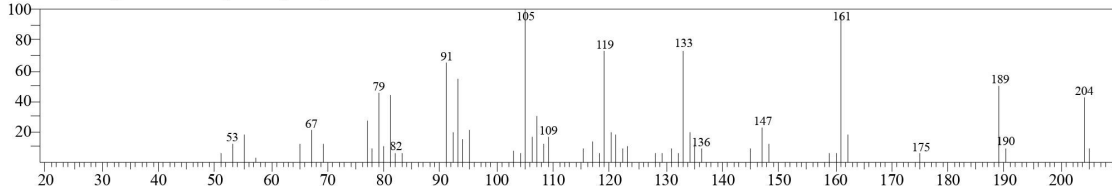

Spectrum2 #Library# NIST11s.lib Entry:18118 Formula:C15H24 CAS:10219-75-7 MolWeight:204  
 MassPeaks:100 BasePeak:161.00(10000)  
 CompName:Naphthalene, 1,2,3,5,6,7,8,8a-octahydro-1,8a-dimethyl-7-(1-methylethenyl)-, [1S-(1.alpha.,7.alpha.,8a.alpha.)]- \$\$ Eremophila-1(10),11-diene \$\$ Eremophilene \$\$ :

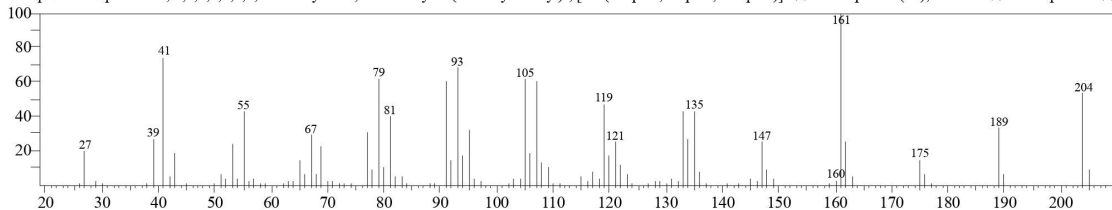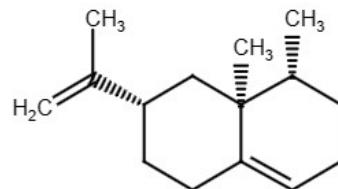

Spectrum Comparison

Spectrum1 #Data# UNK\_2232024\_3.qgd R.Time:10.170(Scan#:718)  
 MassPeaks:75  
 RawMode:Single 10.170(718) BasePeak:93.10(10000)  
 BG Mode:Averaged 10.120-10.210(713-722) Group 1 - Event 1

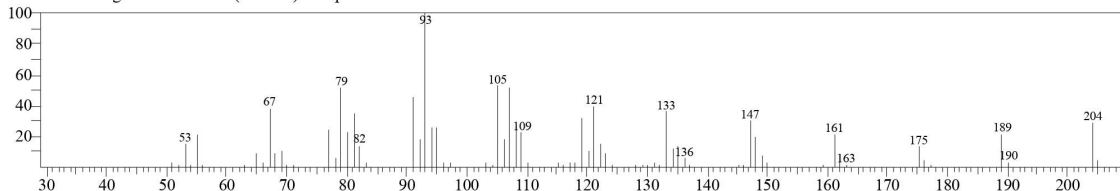

Spectrum2 #Library# NIST11s.lib Entry:18097 Formula:C15H24 CAS:3691-11-0 MolWeight:204  
 MassPeaks:117 BasePeak:108.00(10000)  
 CompName:Azulene, 1,2,3,5,6,7,8,8a-octahydro-1,4-dimethyl-7-(1-methylethenyl)-, [1S-(1.alpha.,7.alpha.,8a.beta.)]- \$\$ Guaia-1(10),11-diene \$\$ .alpha.-Bulnesene \$\$ .delta.-G

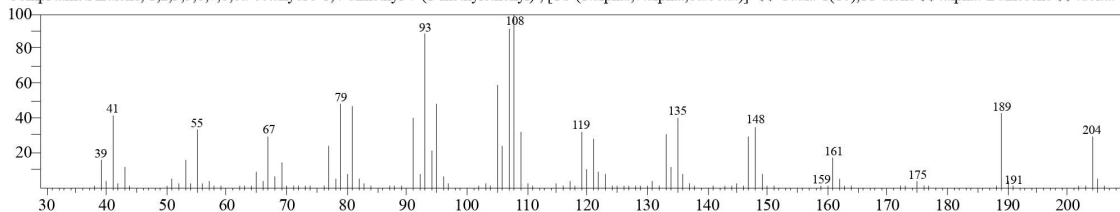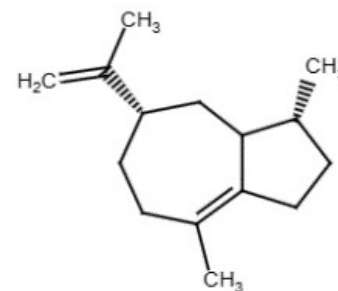

Spectrum Comparison

Spectrum1 #Data# UNK\_2232024\_3.qgd R.Time:10.470(Scan#:748)

MassPeaks:54

RawMode:Single 10.470(748) BasePeak:161.15(10000)

BG Mode:Averaged 10.410-10.500(742-751) Group 1 - Event 1

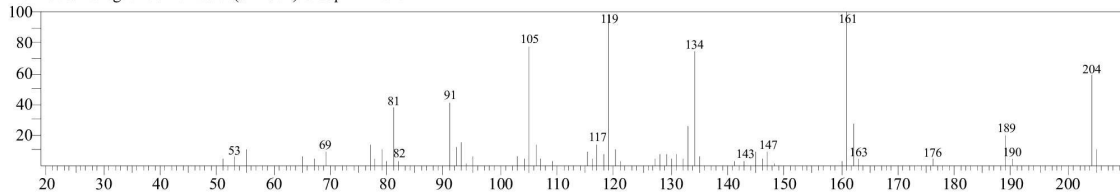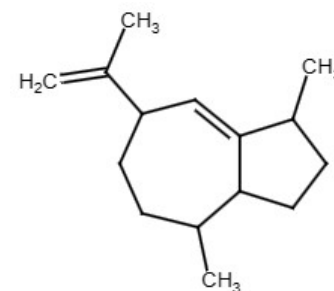

Spectrum2 #Library# NIST11s.lib Entry:18135 Formula:C15H24 CAS:483-76-1 MolWeight:204

MassPeaks:88 BasePeak:161.00(10000)

CompName:Naphthalene, 1,2,3,5,6,8a-hexahydro-4,7-dimethyl-1-(1-methylethyl)-, (1S-cis)- SS Cadina-1(10),4-diene SS .delta.-Cadinene, (+)- SS (+)-.delta.-Cadinene SS .delta.-

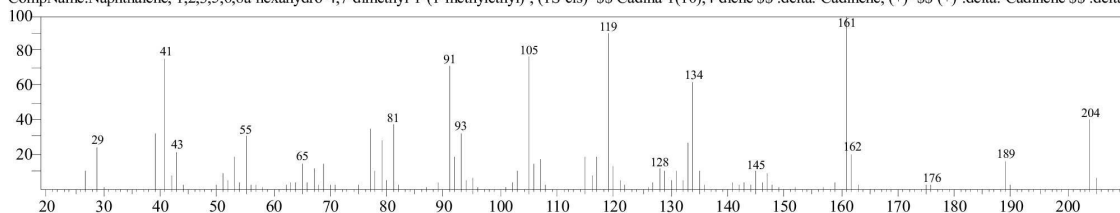

Spectrum Comparison

Spectrum1 #Data# UNK\_2232024\_3.qgd R.Time:10.540(Scan#:755)

MassPeaks:48

RawMode:Single 10.540(755) BasePeak:159.15(10000)

BG Mode:Averaged 10.500-10.580(751-759) Group 1 - Event 1

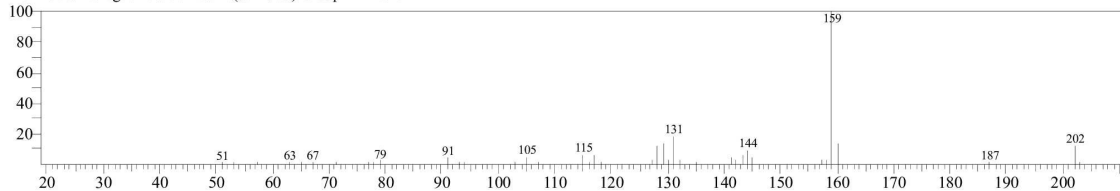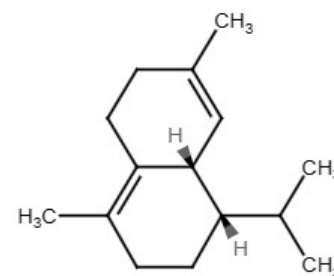

Spectrum2 #Library# NIST11s.lib Entry:17784 Formula:C15H22 CAS:483-77-2 MolWeight:202

MassPeaks:74 BasePeak:159.00(10000)

CompName:Naphthalene, 1,2,3,4-tetrahydro-1,6-dimethyl-4-(1-methylethyl)-, (1S-cis)- SS Cadina-1,3,5-triene SS (-)-Calamenene SS L-calamenene SS Calamenene SS 4-Isoprop

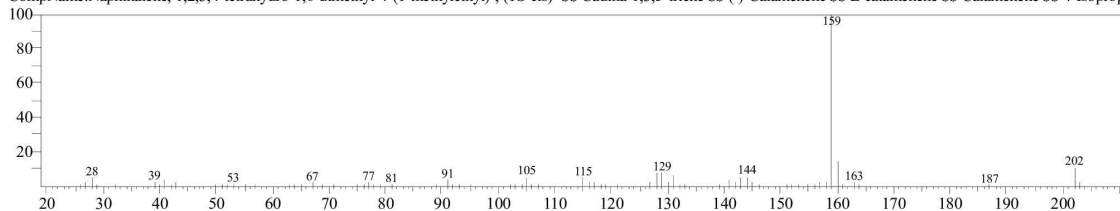

Spectrum Comparison

Spectrum1 #Data# UNK\_2232024\_3.qgd R.Time:10.680(Scan#:769)

MassPeaks:57

RawMode:Single 10.680(769) BasePeak:119.10(10000)

BG Mode:Averaged 10.640-10.710(765-772) Group 1 - Event 1

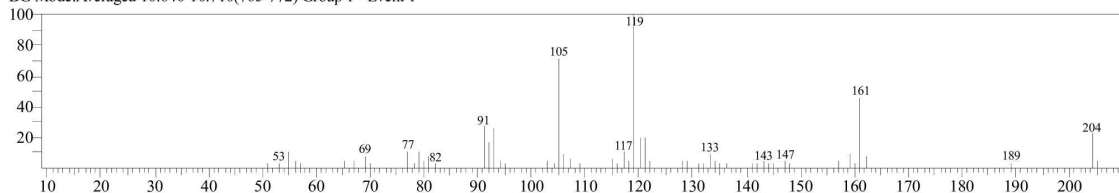

Spectrum2 #Library# NIST1s.lib Entry:18105 Formula:C15H24 CAS:16728-99-7 MolWeight:204

MassPeaks:92 BasePeak:119.00(10000)

CompName:Naphthalene, 1,2,3,4,4a,7-hexahydro-1,6-dimethyl-4-(1-methylethyl)- SS Naphthalene, 1,2,3,4,6,8a-hexahydro-1-isopropyl-4,7-dimethyl- SS 4-Isopropyl-1,6-dimethyl-

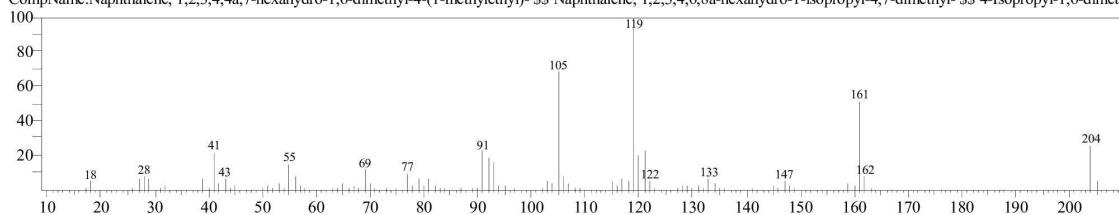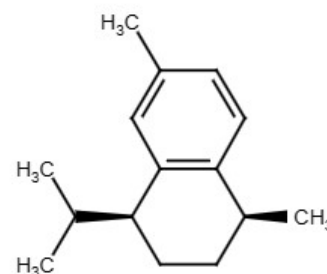

Spectrum Comparison

Spectrum1 #Data# UNK\_2232024\_3.qgd R.Time:10.680(Scan#:769)

MassPeaks:57

RawMode:Single 10.680(769) BasePeak:119.10(10000)

BG Mode:Averaged 10.640-10.710(765-772) Group 1 - Event 1

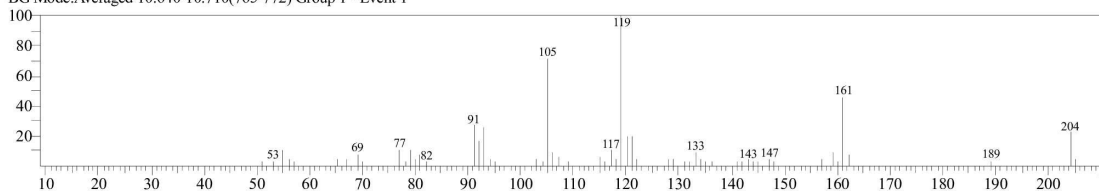

Spectrum2 #Library# NIST1s.lib Entry:18105 Formula:C15H24 CAS:16728-99-7 MolWeight:204

MassPeaks:92 BasePeak:119.00(10000)

CompName:Naphthalene, 1,2,3,4,4a,7-hexahydro-1,6-dimethyl-4-(1-methylethyl)- SS Naphthalene, 1,2,3,4,6,8a-hexahydro-1-isopropyl-4,7-dimethyl- SS 4-Isopropyl-1,6-dimethyl-

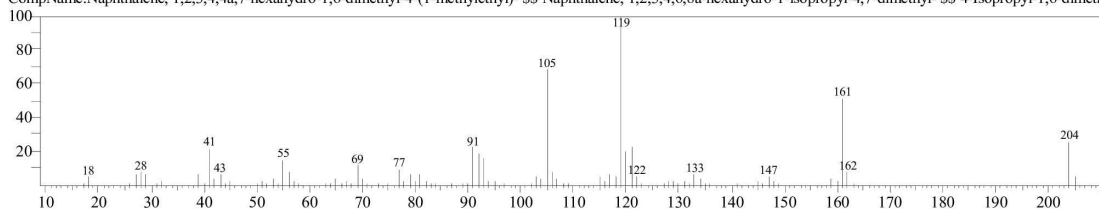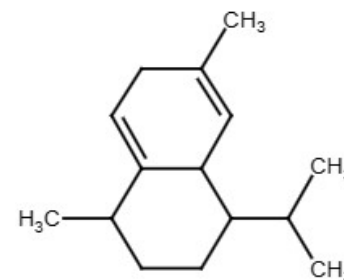

Spectrum Comparison

Spectrum1 #Data# UNK\_2232024\_3.qgd R.Time:10.800(Scan#:781)

MassPeaks:17

RawMode:Single 10.800(781) BasePeak:157.10(10000)

BG Mode:Averaged 10.770-10.830(778-784) Group 1 - Event 1

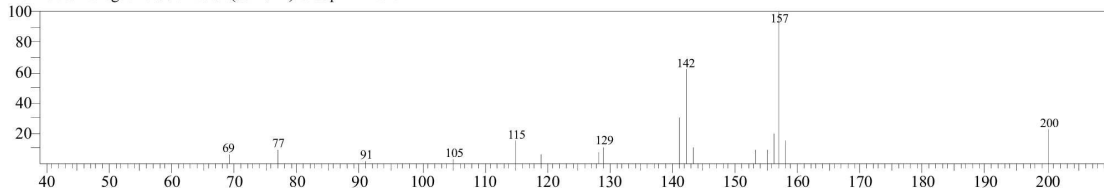

Spectrum2 #Library# NIST11s.lib Entry:13177 Formula:C13H16 CAS:30364-38-6 MolWeight:172

MassPeaks:44 BasePeak:157.00(10000)

CompName:Naphthalene, 1,2-dihydro-1,1,6-trimethyl- SS 1,1,6-Trimethyl-1,2-dihydronaphthalene SS Dehydro-ar-ionene SS 1,2-Dihydro-1,1,6-trimethylnaphthalene SS

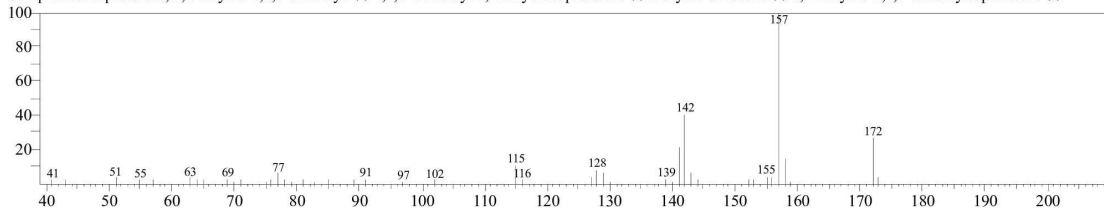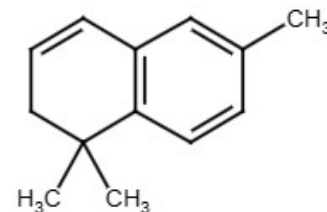

Spectrum Comparison

Spectrum1 #Data# UNK\_2232024\_3.qgd R.Time:11.390(Scan#:840)

MassPeaks:53

RawMode:Single 11.390(840) BasePeak:79.05(10000)

BG Mode:Averaged 11.330-11.430(834-844) Group 1 - Event 1

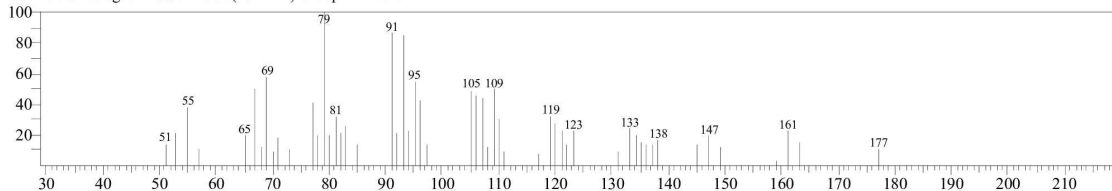

Spectrum2 #Library# NIST11s.lib Entry:20008 Formula:C15H24O CAS:1139-30-6 MolWeight:220

MassPeaks:130 BasePeak:43.00(10000)

CompName:Caryophyllene oxide SS 5-Oxatricyclo[8.2.0.0(4,6)]dodecane, 4,12,12-trimethyl-9-methylene-, [1R-(1R\*,4R\*,6R\*,10S\*)]- SS 5-Oxatricyclo(8.2.0.0(4,6))dodecane.

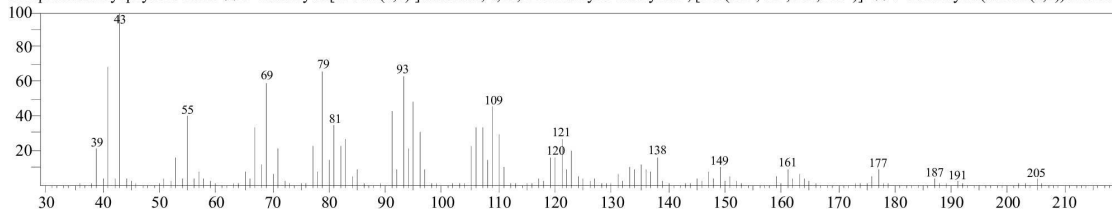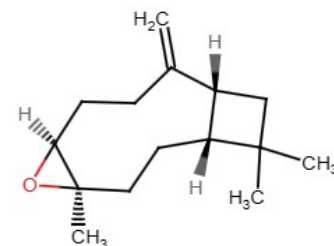

Spectrum Comparison

Spectrum1 #Data# UNK\_2232024\_3.qgd R.Time:11.540(Scan#:855)  
 MassPeaks:23  
 RawMode:Single 11.540(855) BasePeak:161.15(10000)  
 BG Mode:Averaged 11.510-11.580(852-859) Group 1 - Event 1

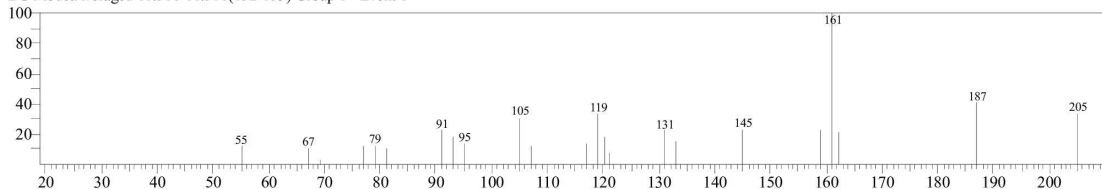

Spectrum2 #Library# NIST11s.lib Entry:18129 Formula:C15H24 CAS:150320-52-8 MolWeight:204  
 MassPeaks:141 BasePeak:161.00(10000)  
 CompName:Bicyclo[4.4.0]dec-1-ene, 2-isopropyl-5-methyl-9-methylene- SS 8-Isopropyl-5-methyl-2-methylene-1,2,3,4,4a,5,6,7-octahydronaphthalene # SS 2-Isopropyl-5-methyl-

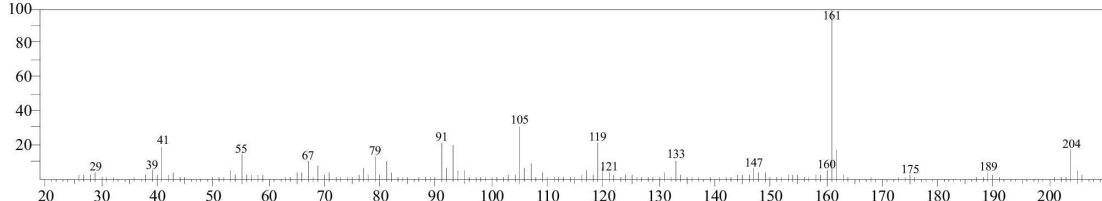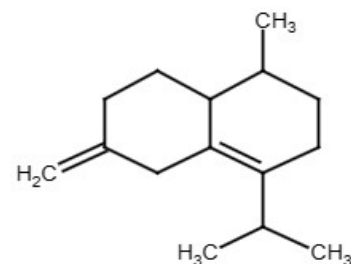

Spectrum Comparison

Spectrum1 #Data# UNK\_2232024\_3.qgd R.Time:11.860(Scan#:887)  
 MassPeaks:55  
 RawMode:Single 11.860(887) BasePeak:159.15(10000)  
 BG Mode:Averaged 11.830-11.890(884-890) Group 1 - Event 1

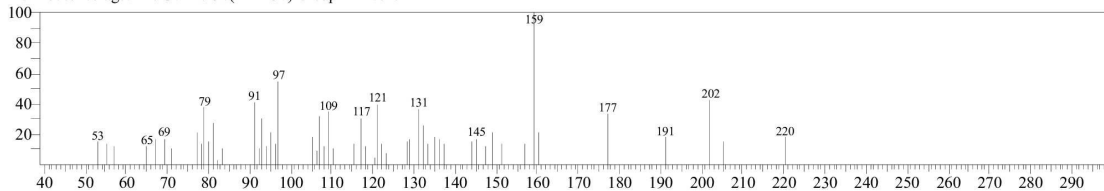

Spectrum2 #Library# SWGDRUG MS LIBRARY VERSION 3.10.lib Entry:2918 Formula:C19H30O2 CAS:1852-61-5 MolWeight:290  
 MassPeaks:125 BasePeak:91.00(10000)  
 CompName:4-Androstene-3.alpha.,17.beta.-diol

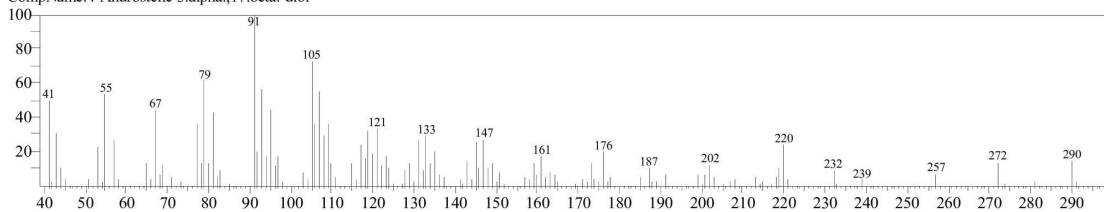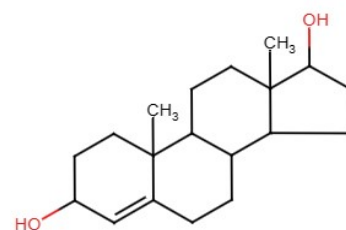

Spectrum Comparison

Spectrum1 #Data# UNK\_2232024\_3.qgd R.Time:12.040(Scan#:905)  
 MassPeaks:81  
 RawMode:Single 12.040(905) BasePeak:136.15(10000)  
 BG Mode:Averaged 11.970-12.090(898-910) Group 1 - Event 1

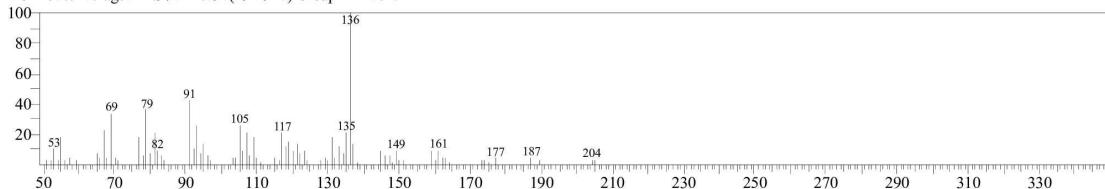

Spectrum2 #Library# MPW2011.lib Entry:5616 Formula:C22H32O3 CAS:0-00-0 MolWeight:344  
 MassPeaks:50 BasePeak:123.00(10000)  
 CompName:Metenolone acetate P983

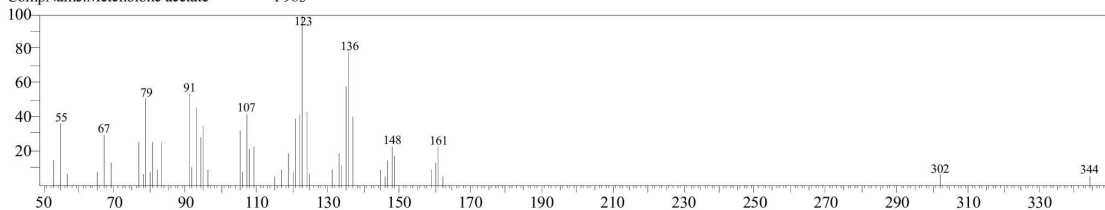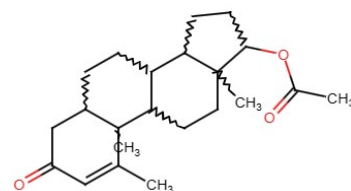

Spectrum Comparison

Spectrum1 #Data# UNK\_2232024\_3.qgd R.Time:12.320(Scan#:933)  
 MassPeaks:64  
 RawMode:Single 12.320(933) BasePeak:81.10(10000)  
 BG Mode:Averaged 12.280-12.340(929-935) Group 1 - Event 1

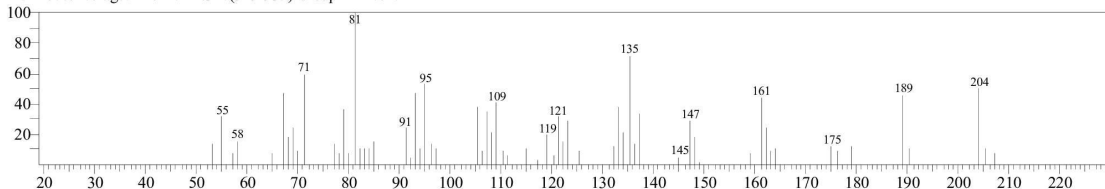

Spectrum2 #Library# NIST11s.lib Entry:20299 Formula:C15H26O CAS:473-04-1 MolWeight:222  
 MassPeaks:140 BasePeak:161.00(10000)  
 CompName:1-Naphthalenol, decahydro-1,4a-dimethyl-7-(1-methylethylidene)-, [1R-(1.alpha.,4a.beta.,8a.alpha.)]-SS Eudesm-7(11)-en-4-ol SS Juniper camphor SS 7(11)-Seline

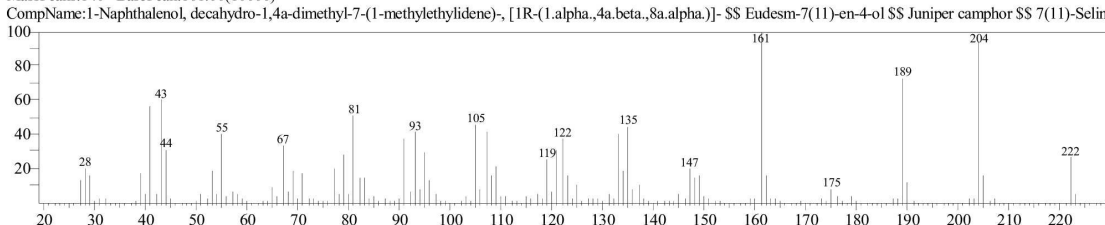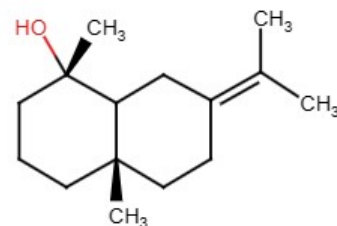

Spectrum Comparison

Spectrum1 #Data# UNK\_2232024\_3.qgd R.Time:12.560(Scan#:957)

MassPeaks:33

RawMode:Single 12.560(957) BasePeak:119.10(10000)

BG Mode:Averaged 12.530-12.590(954-960) Group 1 - Event 1

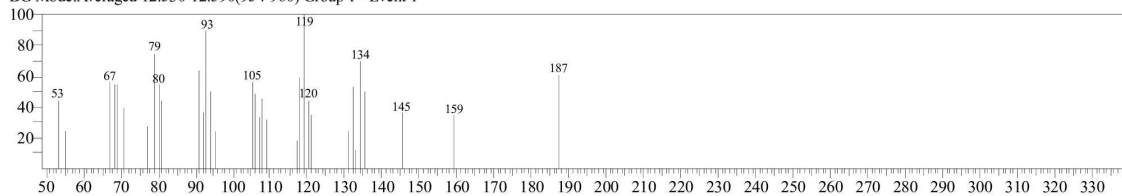

Spectrum2 #Library# NIST11s.lib Entry:27690 Formula:C22H34O2 CAS:84494-70-2 MolWeight:330

MassPeaks:192 BasePeak:79.00(10000)

CompName:Ethyl 5,8,11,14,17-icosapentaenoate \$\$ Ethyl (5E,8E,11E,14E,17E)-5,8,11,14,17-icosapentaenoate # \$\$

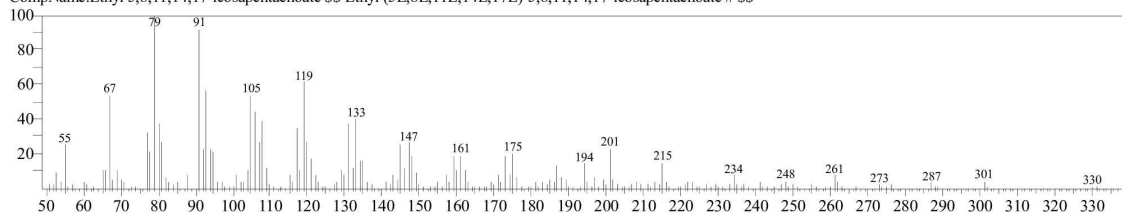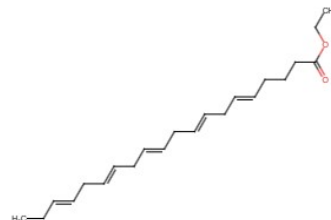

Spectrum Comparison

Spectrum1 #Data# UNK\_2232024\_3.qgd R.Time:14.680(Scan#:1169)

MassPeaks:48

RawMode:Single 14.680(1169) BasePeak:95.10(10000)

BG Mode:Averaged 14.610-14.760(1162-1177) Group 1 - Event 1

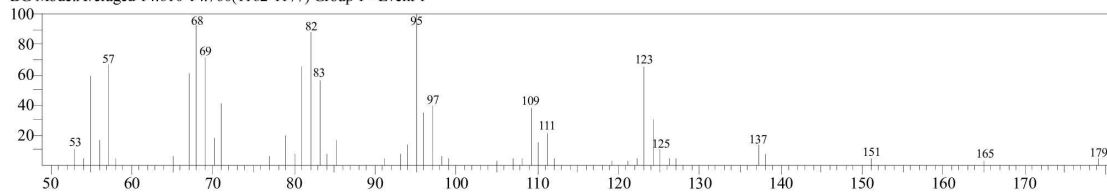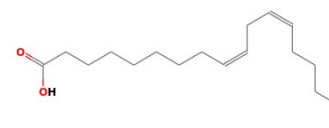

Spectrum2 #Library# MPW2011.lib Entry:3284 Formula:C18H32O2 CAS:60-33-3 MolWeight:280

MassPeaks:50 BasePeak:55.00(10000)

CompName:Linoleic acid @P651

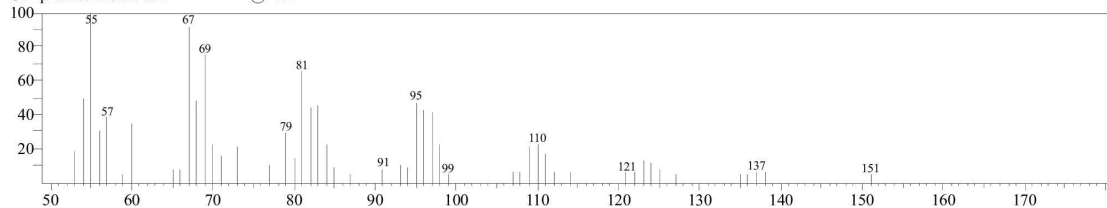



Spectrum Comparison

Spectrum1 #Data# UNK\_2232024\_3.qgd R.Time:15.110(Scan#:1212)  
 MassPeaks:21  
 RawMode:Single 15.110(1212) BasePeak:81.10(10000)  
 BG Mode:Averaged 15.060-15.190(1207-1220) Group 1 - Event 1

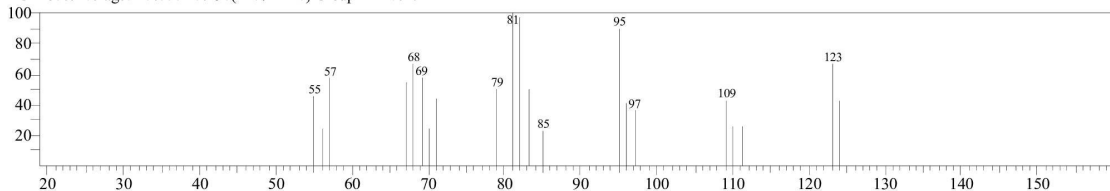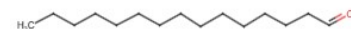

Spectrum2 #Library# NIST11s.lib Entry:20737 Formula:C15H30O CAS:2765-11-9 MolWeight:226  
 MassPeaks:44 BasePeak:82.00(10000)  
 CompName:1-Pentadecanal

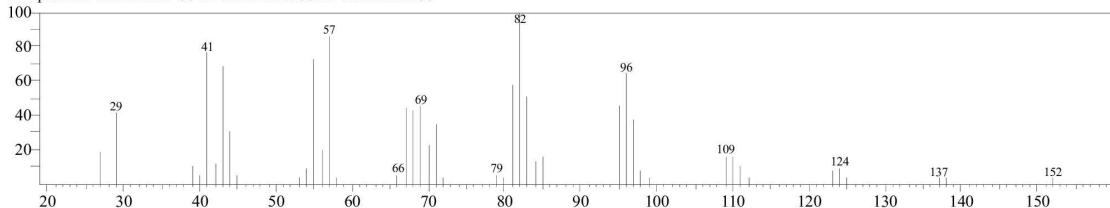

Spectrum Comparison

Spectrum1 #Data# UNK\_2232024\_3.qgd R.Time:15.490(Scan#:1250)  
 MassPeaks:29  
 RawMode:Single 15.490(1250) BasePeak:81.10(10000)  
 BG Mode:Averaged 15.440-15.550(1245-1256) Group 1 - Event 1

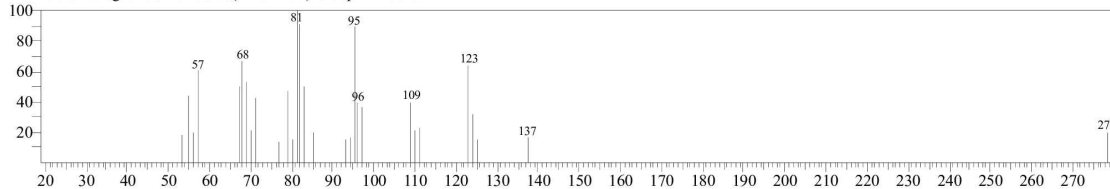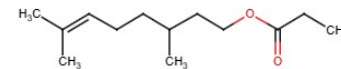

Spectrum2 #Library# NIST11s.lib Entry:19101 Formula:C13H24O2 CAS:141-14-0 MolWeight:212  
 MassPeaks:40 BasePeak:81.00(10000)  
 CompName:6-Octen-1-ol, 3,7-dimethyl-, propionate

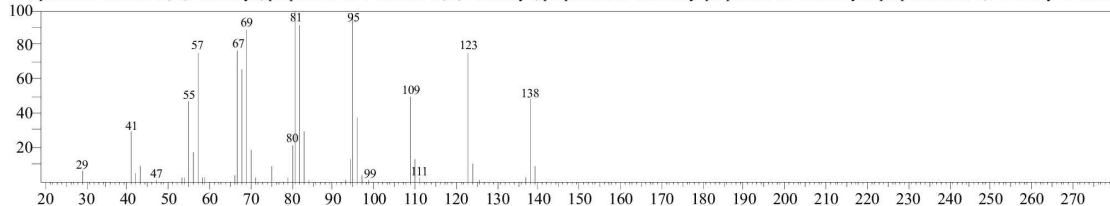

Spectrum Comparison

Spectrum1 #Data# UNK\_2232024\_3.qgd R.Time:16.000(Scan#:1301)  
MassPeaks:35  
RawMode:Single 16.000(1301) BasePeak:164.10(10000)  
BG Mode:Averaged 15.910-16.050(1292-1306) Group 1 - Event 1

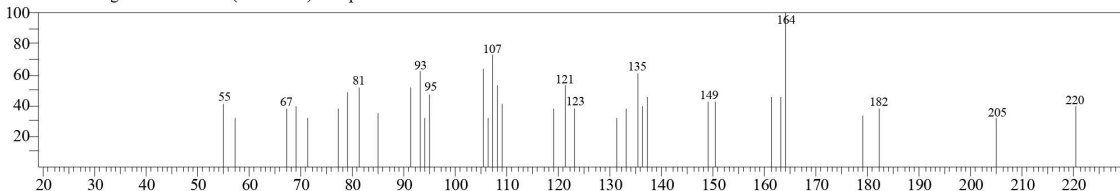

Spectrum2 #Library# NIST11s.lib Entry:20007 Formula:C15H24O CAS:67999-56-8 MolWeight:220  
MassPeaks:116 BasePeak:41.00(10000)  
CompName:4a,7-Methano-4aH-naphth[1,8a-b]oxirene, octahydro-4,4,8,8-tetramethyl-

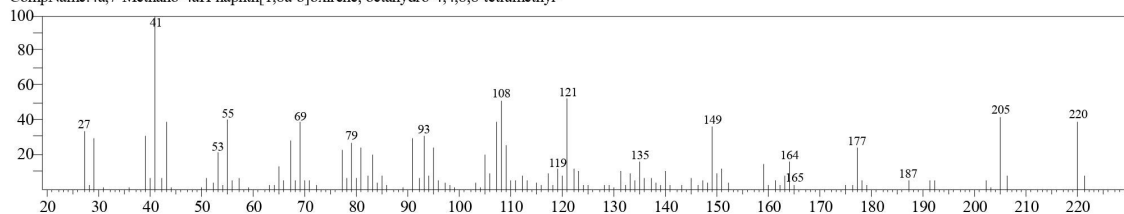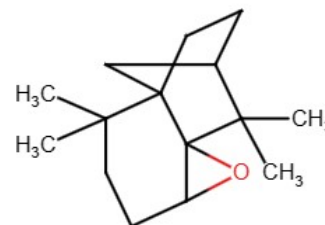

Spectrum Comparison

Spectrum1 #Data# UNK\_2232024\_3.qgd R.Time:22.730(Scan#:1974)  
MassPeaks:60  
RawMode:Single 22.730(1974) BasePeak:59.05(10000)  
BG Mode:Averaged 22.620-22.870(1963-1988) Group 1 - Event 1

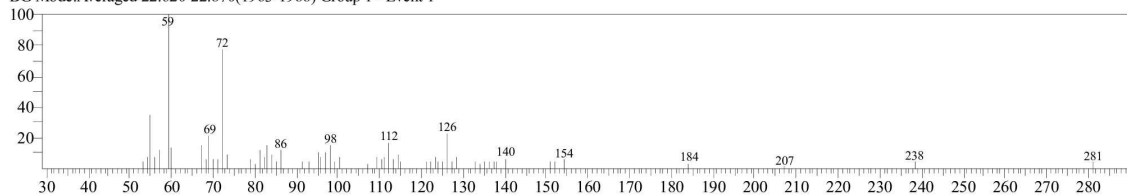

Spectrum2 #Library# SWGDRUG MS LIBRARY VERSION 3.10.lib Entry:424 Formula:C18H35NO CAS:301-02-0 MolWeight:281  
MassPeaks:128 BasePeak:59.00(10000)  
CompName:Oleamide

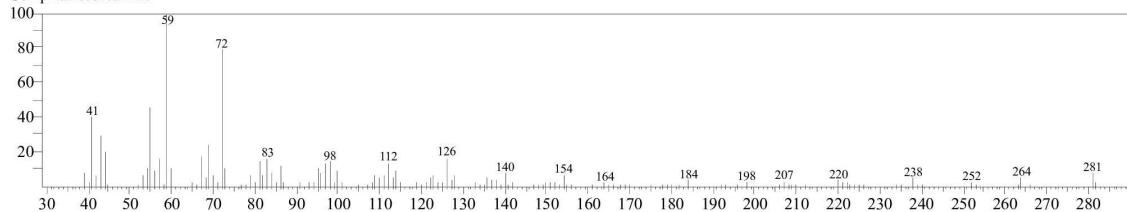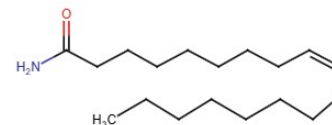

Spectrum Comparison

Spectrum1 #Data# UNK\_2232024\_3.qgd R.Time:26.350(Scan#:2336)  
MassPeaks:27  
RawMode:Single 26.350(2336) BasePeak:247.15(10000)  
BG Mode:Averaged 26.220-26.430(2323-2344) Group 1 - Event 1

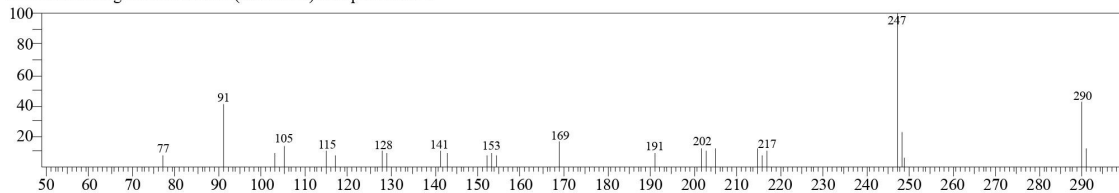

Spectrum2 #Library# MPW2011.lib Entry:3649 Formula:C20H18O2 CAS:0-00-0 MolWeight:290  
MassPeaks:50 BasePeak:248.00(10000)  
CompName:Amitriptyline-M -(CH3)2NOH AC @P699

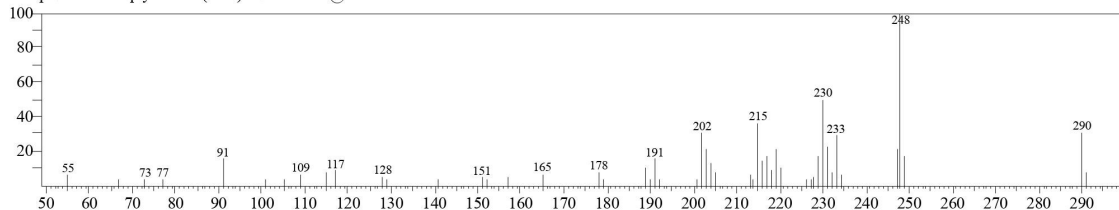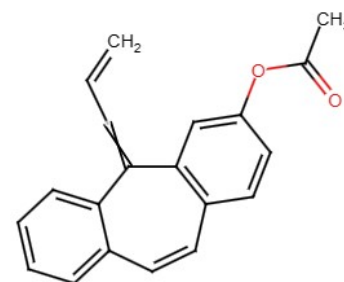

Spectrum Comparison

Spectrum1 #Data# UNK\_2232024\_3.qgd R.Time:30.350(Scan#:2736)  
MassPeaks:58  
RawMode:Single 30.350(2736) BasePeak:69.10(10000)  
BG Mode:Averaged 30.280-30.440(2729-2745) Group 1 - Event 1

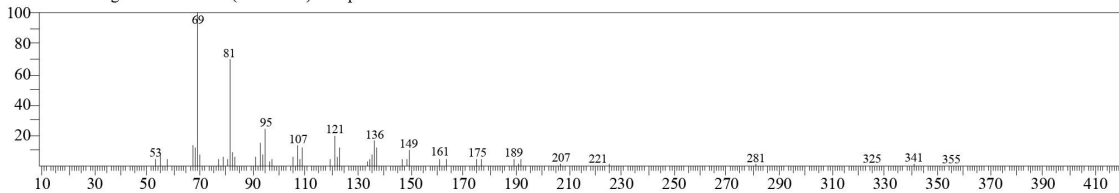

Spectrum2 #Library# NIST11s.lib Entry:29859 Formula:C30H50 CAS:111-02-4 MolWeight:410  
MassPeaks:146 BasePeak:69.00(10000)

CompName:Squalene \$\$ 2,6,10,14,18,22-Tetracosahexaene, 2,6,10,15,19,23-hexamethyl-, (all-E)- \$\$ all-trans-Squalene \$\$ trans-Squalene \$\$ Spinacen \$\$ Spinacene \$\$ Squalen

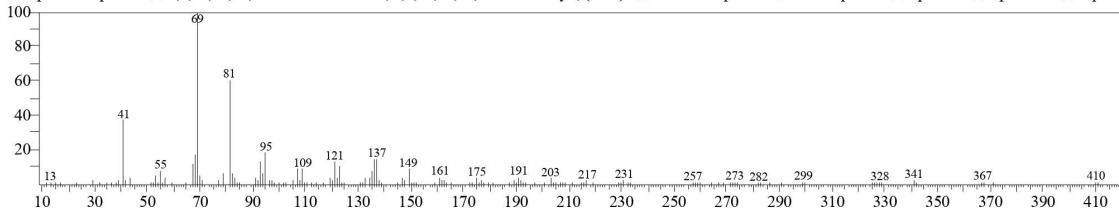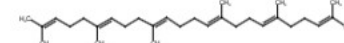

Spectrum Comparison

Spectrum1 #Data# UNK\_2232024\_3.qgd R.Time:32.110(Scan#:2912)

MassPeaks:72

RawMode:Single 32.110(2912) BasePeak:145.15(10000)

BG Mode:Averaged 32.030-32.170(2904-2918) Group 1 - Event 1

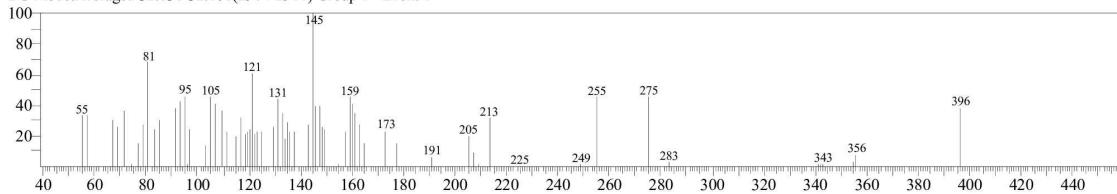

Spectrum2 #Library# NIST11s.lib Entry:30335 Formula:C31H52O2 CAS:915-05-9 MolWeight:456

MassPeaks:157 BasePeak:43.00(10000)

CompName:.beta.-Sitosterol acetate SS Stigmast-5-en-3-ol, acetate, (3.beta.)- SS .beta.-Sitosterol 3-acetate SS .beta.-Sitosteryl acetate SS Acetyl-.beta.-sitosterol SS Sitosteryl ace

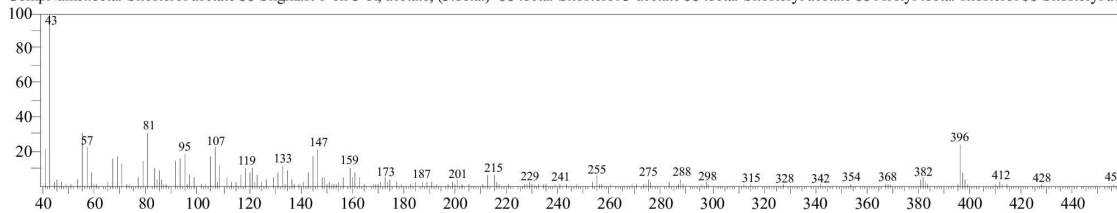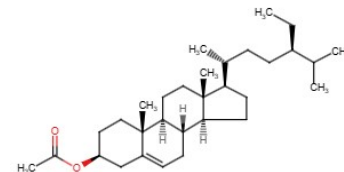

Spectrum Comparison

Spectrum1 #Data# UNK\_2232024\_3.qgd R.Time:33.810(Scan#:3082)

MassPeaks:92

RawMode:Single 33.810(3082) BasePeak:147.15(10000)

BG Mode:Averaged 33.700-33.900(3071-3091) Group 1 - Event 1

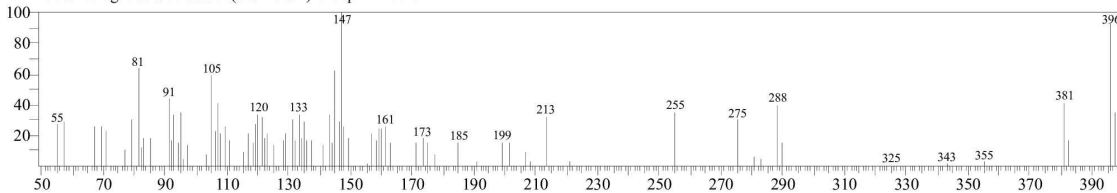

Spectrum2 #Library# MPW2011.lib Entry:7013 Formula:C29H48 CAS:0-00-0 MolWeight:396

MassPeaks:50 BasePeak:396.00(10000)

CompName:Clonasterol -H2O @P1182

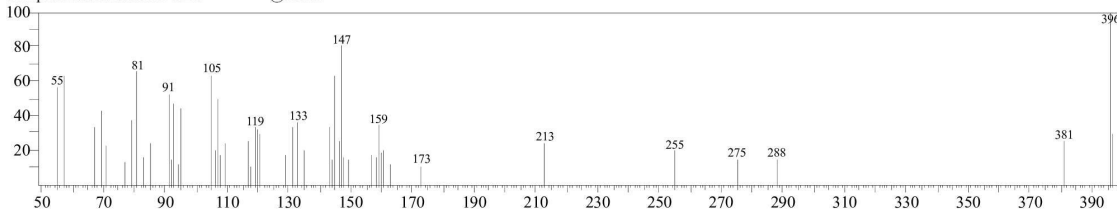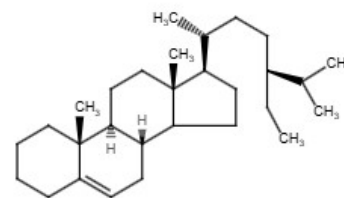

Spectrum Comparison

Spectrum1 #Data# UNK\_2232024\_3.qgd R.Time:37.420(Scan#:3443)

MassPeaks:95

RawMode:Single 37.420(3443) BasePeak:329.30(10000)

BG Mode:Averaged 37.330-37.510(3434-3452) Group 1 - Event 1

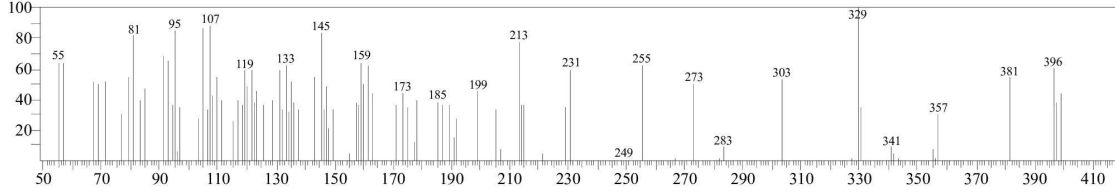

Spectrum2 #Library# MPW2011.lib Entry:7358 Formula:C29H50O CAS:83-47-6 MolWeight:414

MassPeaks:50 BasePeak:55.00(10000)

CompName:Stigmast-5-en-3-ol @P1232

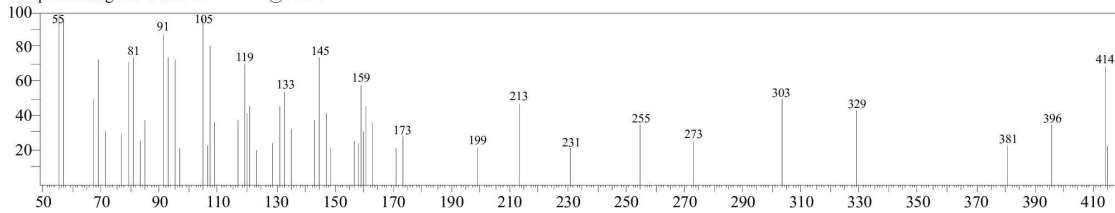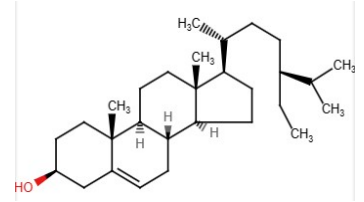

Chromatogram (All TIC)

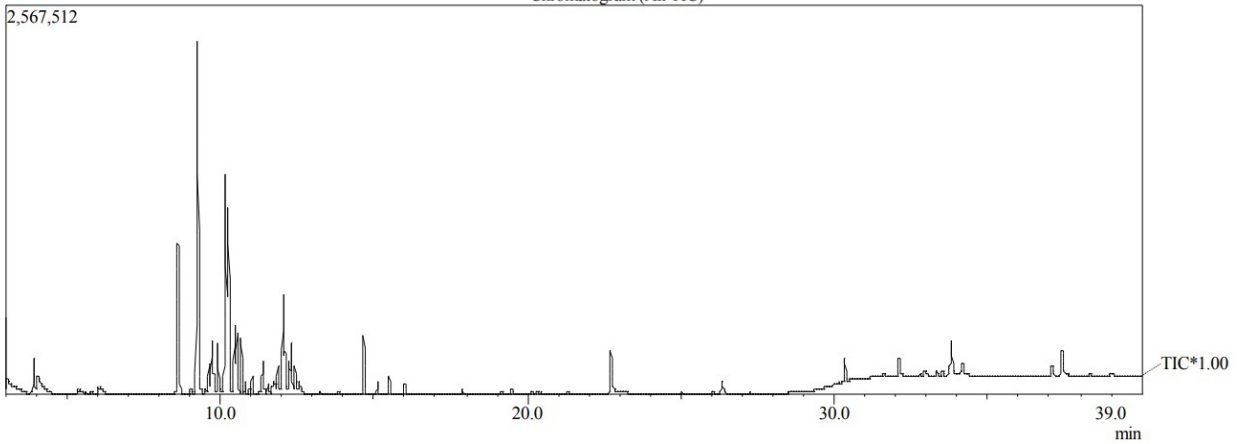

Chromatogram (Zoom)

2,598,965

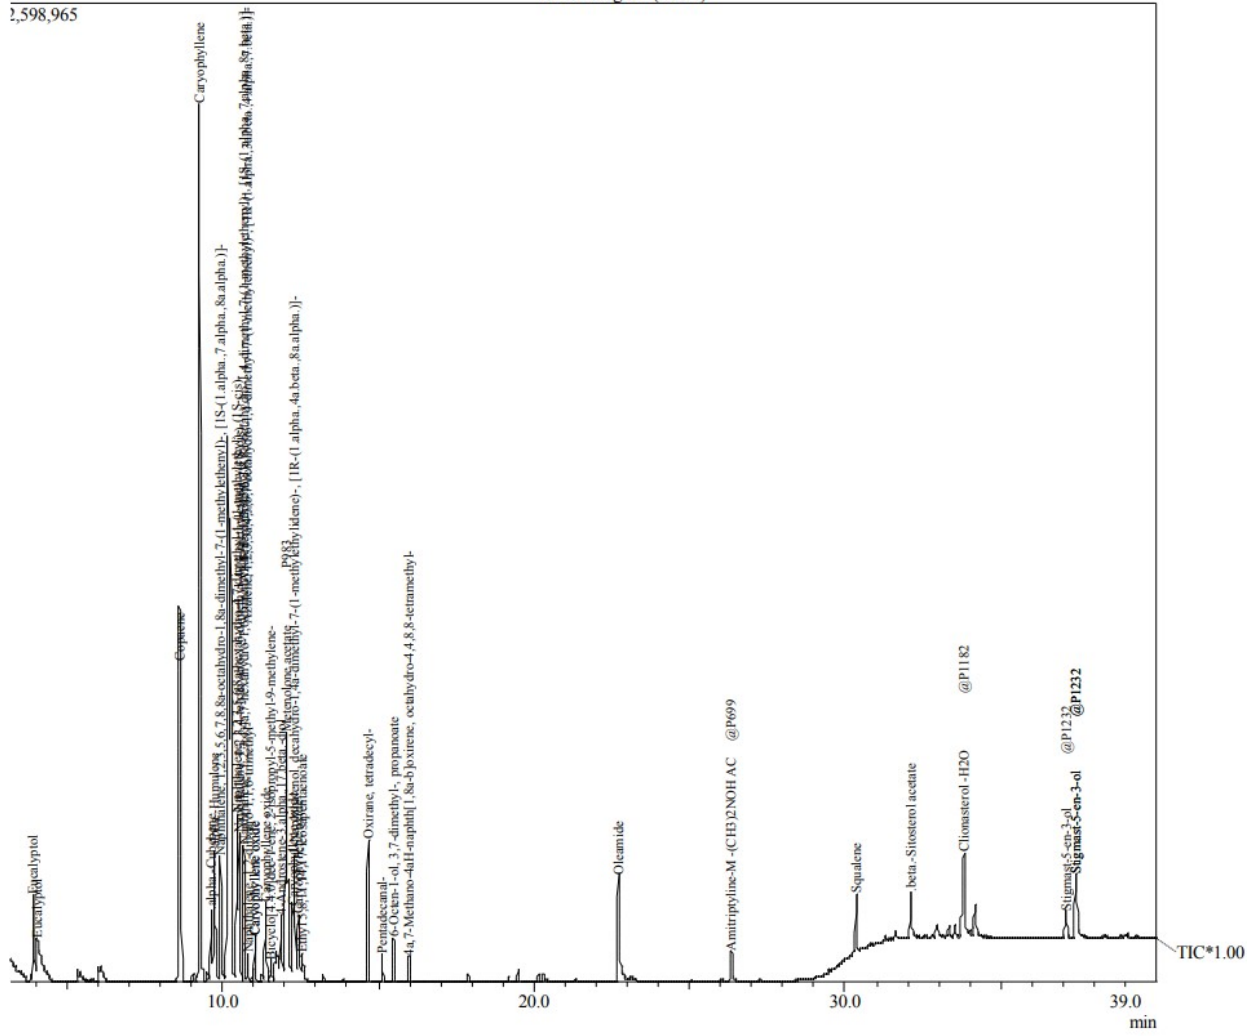

**Table S4. Identified Bioactive Compounds Structures and Description**

| CID | Name               | Structure                                                                           | Type of Phytochemical | SMILES                                                   | CID | Name                                          | Structure                                                                             | Type of Phytochemical | SMILES                                                       |
|-----|--------------------|-------------------------------------------------------------------------------------|-----------------------|----------------------------------------------------------|-----|-----------------------------------------------|---------------------------------------------------------------------------------------|-----------------------|--------------------------------------------------------------|
| 1   | Eucalyptol         |    | Terpenoid             | <chem>CC12CCC(CC1)C(C)(C)O2</chem>                       | 15  | 4-Androstene-3. $\alpha$ .,17. $\beta$ .-diol |    | Steroid               | <chem>CC12CCC3C(CCC4=CC(O)CCC34C)C1CCC2O</chem>              |
| 2   | $\alpha$ -Copaene  |    | Terpenoid             | <chem>CC(C)C1CCC2(C)C3CC=C(C)C2C13</chem>                | 16  | Methenolone acetate                           |    | Steroid               | <chem>CC(=O)OC1CCC2C3CCC4CC(=O)C=C(C)C4(C)C3CCC12C</chem>    |
| 3   | Caryophyllene      |    | Terpenoid             | <chem>[H][C@]12CC(C)(C)[C@]1([H])CC\C(C)=C\CCC2=C</chem> | 17  | Juniper camphor                               |    | Terpenoid             | <chem>CC(C)=C1CC[C@]2(C)CCC[C@](C)(O)C2C1</chem>             |
| 4   | $\alpha$ -Cubebene |    | Terpenoid             | <chem>CC(C)C1CCC(C)C23CC=C(C)C2C13</chem>                | 18  | Ethyl 5,8,11,14,17-icosapentaenoate           |    | Fatty acid            | <chem>CCOC(=O)CCC\C=C\C\C=C\C\C=C\C\C=C\C\C=C\C\C=C\C</chem> |
| 5   | Humulene           |  | Terpenoid             | <chem>C\C1=C/CC(C)(C)\C=C\C\C(C)=C\CC1</chem>            | 19  | Linoleic Acid                                 |  | Fatty Acid            | <chem>CCCCCCCCCCCCCCC1CO1</chem>                             |
| 6   | Valencene          |  | Terpenoid             | <chem>C[C@@H]1CCC=C2CC[C@@H](C[C@@]1]2C)C(C)=C</chem>    | 20  | 1-Pentadecanal                                |  | Fatty Aldehyde        | <chem>CCCCCCCCCCCCCCC=O</chem>                               |

|    |                                           |                      |                                                        |    |                                                                        |                                                                                       |                           |                                                                     |
|----|-------------------------------------------|----------------------|--------------------------------------------------------|----|------------------------------------------------------------------------|---------------------------------------------------------------------------------------|---------------------------|---------------------------------------------------------------------|
| 7  | $\alpha$ -Bulnesene                       | Terpenoid            | <chem>C[C@@H]1CCC2=C(C)CC[C@@H](CC12)C(C)=C</chem>     | 21 | 6-Octen-1-ol, 3,7-dimethyl-, propanoate                                | 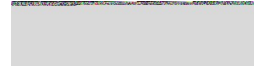   | Terpenoid/terpene alcohol | <chem>CCC(=O)OCCC(C)CCC=C(C)C</chem>                                |
| 8  | $\gamma$ -Gurjunene                       | Terpenoid            | <chem>CC1CCC2C(C)CCC(C=C12)C(C)=C</chem>               | 22 | 4a,7-Methano-4aH-naphth[1,8a-b]oxirene, octahydro-4,4,8,8-tetramethyl- |    | Terpenoid                 | <chem>CC1(CCC2C3(C14)CCC(C4)C3(C)O2)C</chem>                        |
| 9  | $\delta$ -Cadinene, (+)-                  | Terpenoid            | <chem>[H][C@]1(CCC(C)=C2CCC(C)=C[C@]12[H])C(C)C</chem> | 23 | Oleamide                                                               |    | Fatty Acid amide          | <chem>CCCCCCCC=CCCCCCCC(=O)N</chem>                                 |
| 10 | (-)-Calamenene                            | Terpenoid            | <chem>CC(C)[C@@H]1CC[C@H](C)C2=C1C=C(C)C=C2</chem>     | 24 | Amitriptyline-M-(CH <sub>3</sub> ) <sub>2</sub> NOH AC                 |    | Amine                     | <chem>C=1C2CCCCC2\C(=C\C=C)C2CC(CC2C1)OC(C)=O</chem>                |
| 11 | Cadinadiene-1,4                           | Terpenoid            | <chem>CC(C)C1CCC(C)C2=CCC(C)=CC12</chem>               | 25 | Squalene                                                               |  | Terpenoid                 | <chem>CC(=CCCC(=CCC(C)=CCCC=C(C)CC(C)=C(C)CCC=C(C)C)C)C</chem>      |
| 12 | Naphthalene, 1,2-dihydro-1,1,6-trimethyl- | Benzenoids, Aromatic | <chem>CC1=CC2=C(C=C1)C(C)(C)CC=C2</chem>               | 26 | $\beta$ -Sitosterol acetate                                            |  | Terpenoid                 | <chem>CCC(CCC(C)C1CC2C1(CCC3C2CC=C4C3(CCC(C4)OC(=O)C)C)C(C)C</chem> |



|    |                                                            |  |           |                                                                        |    |                    |                                                                                     |              |                                                                                                    |
|----|------------------------------------------------------------|--|-----------|------------------------------------------------------------------------|----|--------------------|-------------------------------------------------------------------------------------|--------------|----------------------------------------------------------------------------------------------------|
| 13 | Caryophyllene oxide                                        |  | Terpenoid | <chem>[H][C@]12CCC(=C)[C@]3([H])CC(C)(C)[C@]3([H])CC[C@@]1(C)O2</chem> | 27 | Clionasterol - H2O | 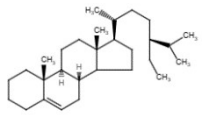 | Phytosterol  | <chem>[H][C@@]12CC=C3CCCC[C@]3(C)[C@@]1([H])CC[C@]1(C)[C@H](CCC21)[C@H](C)CC[C@@H](CC)C(C)C</chem> |
| 14 | Bicyclo[4.4.0]dec-1-ene, 2-isopropyl-5-methyl-9-methylene- |  | Terpenoid | <chem>CC(C)C1=C2CC(=C)CCC2C(C)CC1</chem>                               | 28 | Stigmast-5-en-3-ol |  | Sterol lipid | <chem>CCC(CCC(C)C1CC2C1(CCC3C2CC=C4C3(CCC(C4)O)C)C(C)C.O</chem>                                    |

Note: Compound Identification (CID), Simplified Molecular-Input Line-Entry System (SMILES)

**Table S5.** SwissADME Analysis Report of Top Bioactive Compounds

| CLASS                       | Parameters             | Compound # |         |                    |                    |                    |         |                    | Control            |                    |                    |
|-----------------------------|------------------------|------------|---------|--------------------|--------------------|--------------------|---------|--------------------|--------------------|--------------------|--------------------|
|                             |                        | 1          | 2       | 3                  | 4                  | 5                  | 6       | 7                  | Rivaroxaban        | Apixaban           | Betrixaban         |
| Physico-chemical Properties | MW (g/mol)             | 220.35     | 290.44  | 344.49             | 222.37             | 212.33             | 220.35  | 288.34             | 435.88             | 459.50             | 451.91             |
|                             | # Heavy Atoms          | 16         | 21      | 25                 | 16                 | 15                 | 16      | 22                 | 29                 | 34                 | 32                 |
|                             | # Aromatic Heavy Atoms | 0          | 0       | 0                  | 0                  | 0                  | 0       | 12                 | 11                 | 17                 | 18                 |
|                             | Fraction Csp3          | 0.87       | 0.89    | 0.82               | 0.87               | 0.77               | 1       | 0.05               | 0.32               | 0.28               | 0.13               |
|                             | # Rotatable Bonds      | 0          | 0       | 2                  | 0                  | 8                  | 0       | 3                  | 6                  | 5                  | 9                  |
|                             | # H-bond acceptors     | 1          | 2       | 3                  | 1                  | 2                  | 1       | 2                  | 5                  | 5                  | 5                  |
|                             | # H-bond donors        | 0          | 2       | 0                  | 1                  | 0                  | 0       | 0                  | 1                  | 1                  | 3                  |
|                             | Molar Refractivity     | 68.27      | 86.32   | 99.9               | 70.46              | 65.42              | 66.11   | 90.59              | 114.09             | 132.70             | 125.23             |
| Lipophilicity               | TPSA (Å <sup>2</sup> ) | 12.53      | 40.46   | 43.37              | 20.23              | 26.3               | 12.53   | 26.3               | 116.42             | 110.76             | 107.41             |
|                             | iLOGP                  | 3.11       | 2.92    | 3.19               | 3.1                | 3.57               | 3.06    | 3.23               | 2.95               | 3.62               | 2.72               |
|                             | XLOGP3                 | 3.56       | 3.41    | 4.45               | 3.89               | 4.24               | 3.85    | 4.84               | 2.49               | 2.24               | 3.56               |
|                             | WLOGP                  | 3.94       | 3.67    | 4.7                | 4.06               | 3.71               | 3.77    | 4.5                | 1.76               | 1.94               | 3.75               |
|                             | MLOGP                  | 3.67       | 3.7     | 4.1                | 3.67               | 3.32               | 3.81    | 4.24               | 1.41               | 1.76               | 2.83               |
|                             | Silicos-IT Log P       | 4.07       | 2.99    | 4.13               | 3.75               | 3.58               | 4.18    | 4.87               | 2.84               | 1.96               | 3.24               |
|                             | Consensus Log P        | 3.67       | 3.34    | 4.11               | 3.69               | 3.68               | 3.73    | 4.34               | 2.29               | 2.30               | 3.22               |
| Water Solubility            | ESOL Class             | Soluble    | Soluble | Moderately soluble | Soluble            | Soluble            | Soluble | Moderately soluble | Soluble            | Moderately Soluble | Moderately Soluble |
|                             | Ali Class              | Soluble    | Soluble | Moderately soluble | Moderately soluble | Moderately soluble | Soluble | Moderately soluble | Moderately Soluble | Moderately Soluble | Moderately Soluble |
|                             | Silicos-IT Class       | Soluble    | Soluble | Moderately soluble | Soluble            | Soluble            | Soluble | Moderately soluble | Moderately Soluble | Moderately Soluble | Poorly Soluble     |
| Pharmacokinetics            | GI Absorption          | High       | High    | High               | High               | High               | High    | High               | High               | High               | High               |
|                             | BBB Permeant           | Yes        | Yes     | Yes                | Yes                | Yes                | Yes     | Yes                | No                 | No                 | No                 |
|                             | Pgp Substrate          | No         | Yes     | No                 | No                 | No                 | No      | No                 | Yes                | Yes                | No                 |
|                             | CYP1A2 Inhibitor       | No         | No      | No                 | No                 | No                 | No      | No                 | No                 | No                 | No                 |
|                             | CYP2C19 Inhibitor      | Yes        | No      | No                 | No                 | No                 | No      | Yes                | Yes                | Yes                | Yes                |
|                             | CYP2C9 Inhibitor       | Yes        | No      | Yes                | Yes                | No                 | No      | Yes                | Yes                | Yes                | Yes                |
|                             | CYP2D6 Inhibitor       | No         | No      | No                 | No                 | No                 | No      | No                 | No                 | Yes                | Yes                |
|                             | CYP3A4 Inhibitor       | No         | No      | No                 | No                 | No                 | No      | No                 | Yes                | Yes                | Yes                |
|                             | Log Kp (cm/s)          | -5.12      | -5.65   | -5.24              | -4.89              | -4.58              | -4.91   | -4.62              | -7.19              | -7.51              | -6.53              |
| Drug-likeness               | Lipinski #             | 0          | 0       | 0                  | 0                  | 0                  | 0       | 1                  | 0                  | 0                  | 0                  |
|                             | Ghose #                | 0          | 0       | 0                  | 0                  | 0                  | 0       | 0                  | 0                  | 1                  | 0                  |
|                             | Veber #                | 0          | 0       | 0                  | 0                  | 0                  | 0       | 0                  | 0                  | 0                  | 0                  |

|                        |                           |      |      |      |      |      |      |      |      |      |      |
|------------------------|---------------------------|------|------|------|------|------|------|------|------|------|------|
|                        | Egan #                    | 0    | 0    | 0    | 0    | 0    | 0    | 0    | 0    | 0    | 0    |
|                        | Muegge #                  | 1    | 0    | 0    | 1    | 0    | 1    | 0    | 0    | 0    | 0    |
|                        | Bioavailability Score     | 0.55 | 0.55 | 0.55 | 0.55 | 0.55 | 0.55 | 0.55 | 0.55 | 0.55 | 0.55 |
| Medicinal<br>Chemistry | PAINS # Alerts            | 0    | 0    | 0    | 0    | 0    | 0    | 0    | 0    | 0    | 0    |
|                        | Brenk # Alerts            | 2    | 1    | 0    | 1    | 1    | 1    | 2    | 0    | 0    | 2    |
|                        | Leadlikeness # Violations | 2    | 0    | 1    | 2    | 3    | 2    | 1    | 1    | 1    | 3    |
|                        | Synthetic Accessibility   | 4.35 | 4.96 | 4.87 | 3.69 | 2.84 | 4.87 | 3.33 | 3.63 | 3.48 | 3.05 |

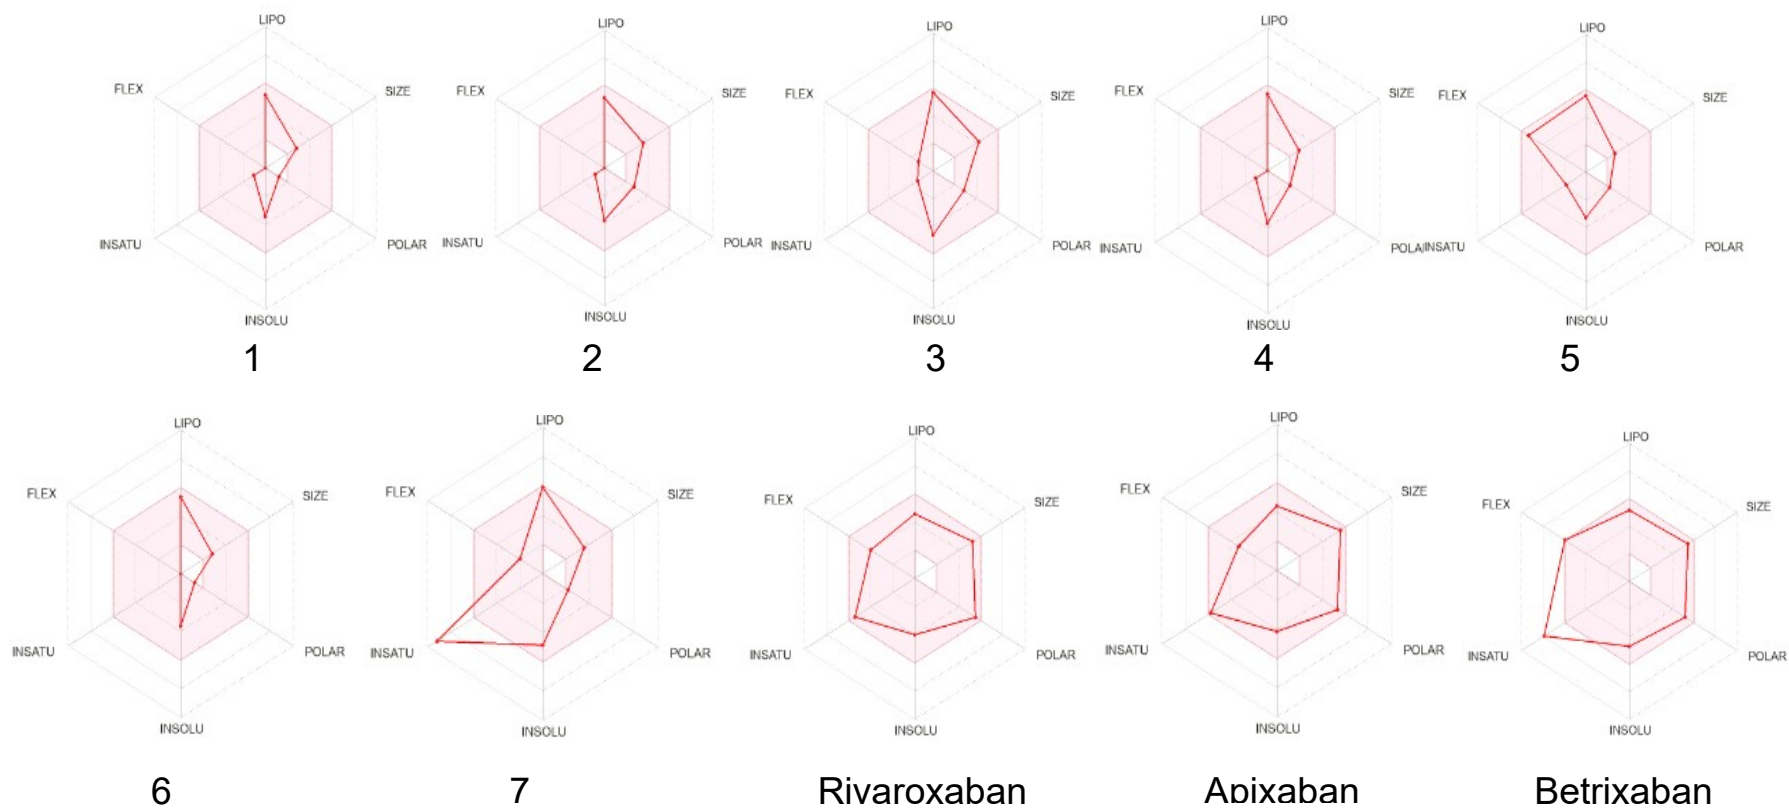

**Figure S3.** Radar Plot of the Bioactive Compound

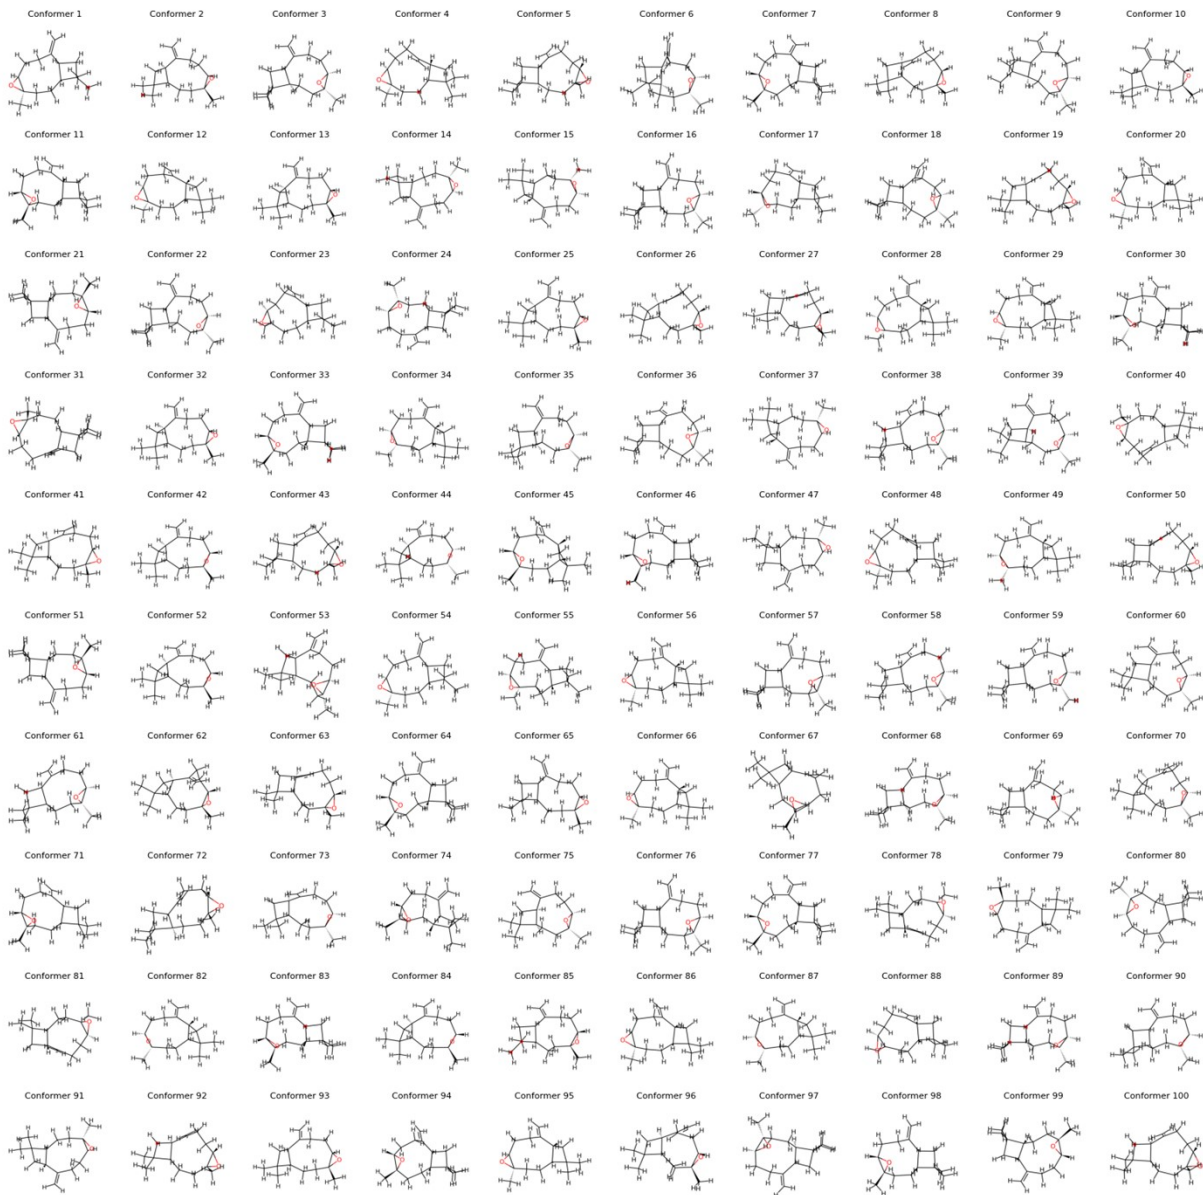

**Figure S4.**

*Analysis of*

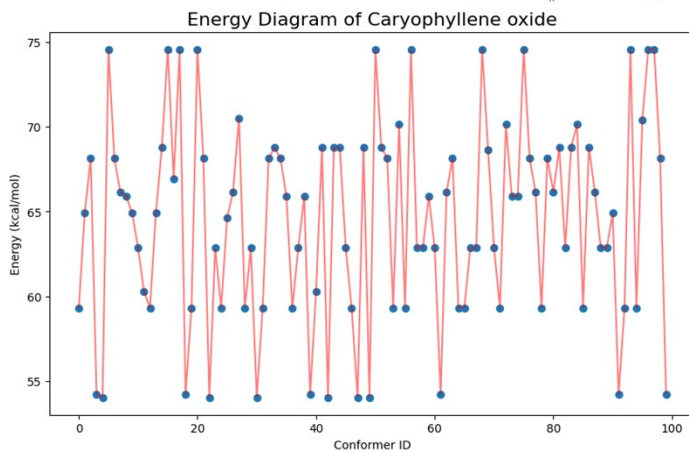

*Conformational  
Compound 1*

**Figure S5. Conformational Analysis of Compound 2**

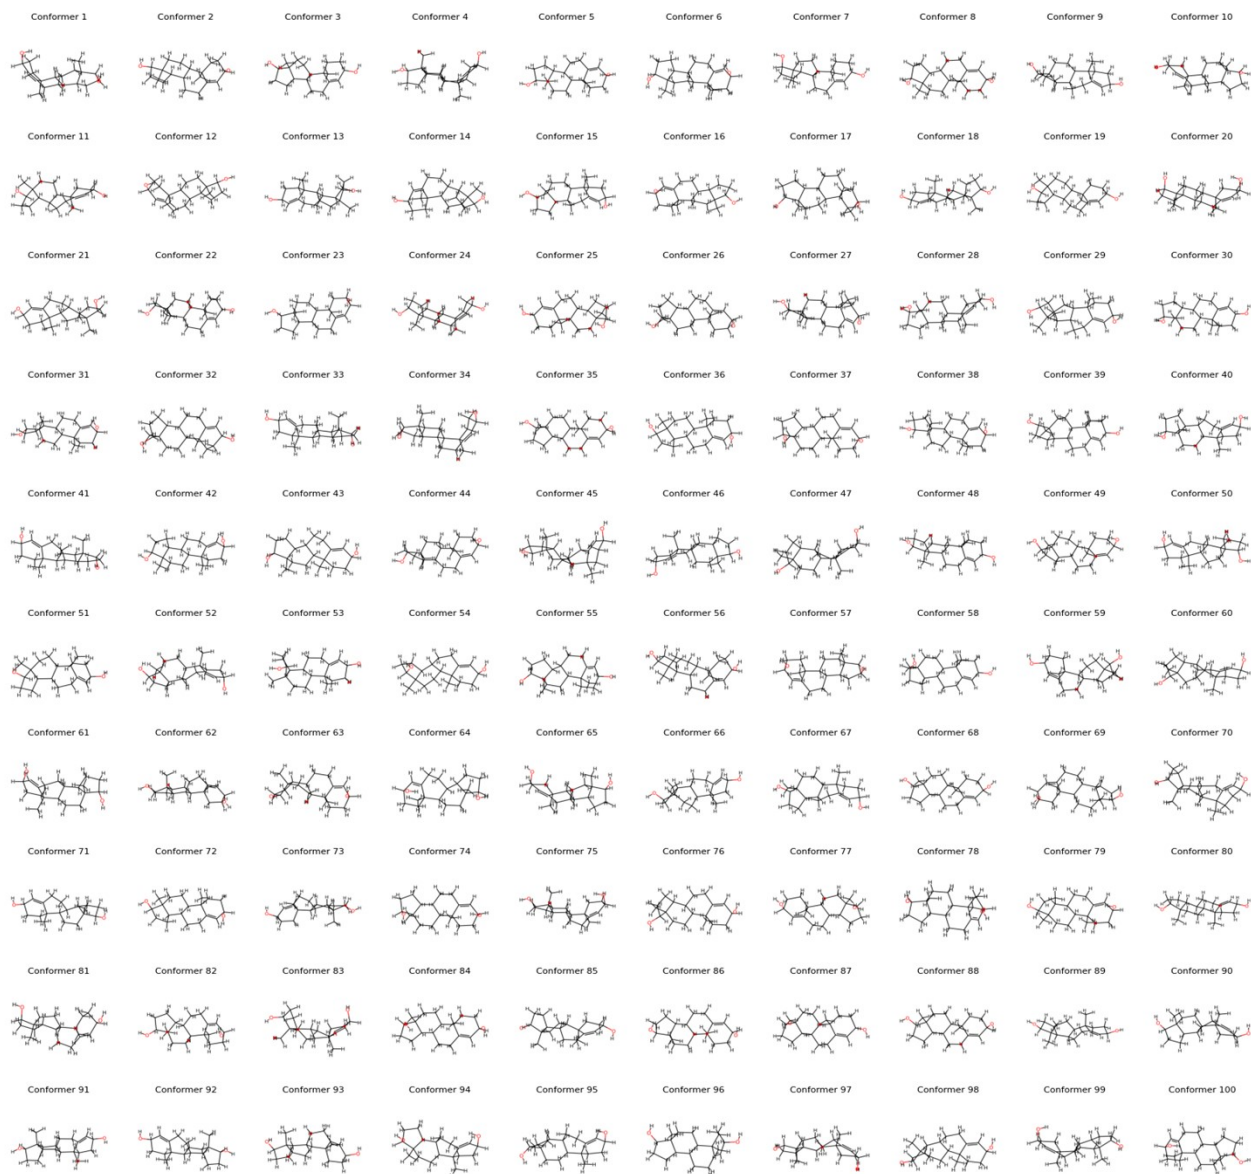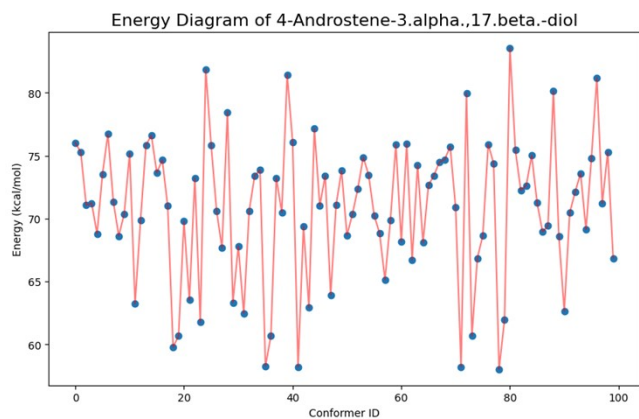

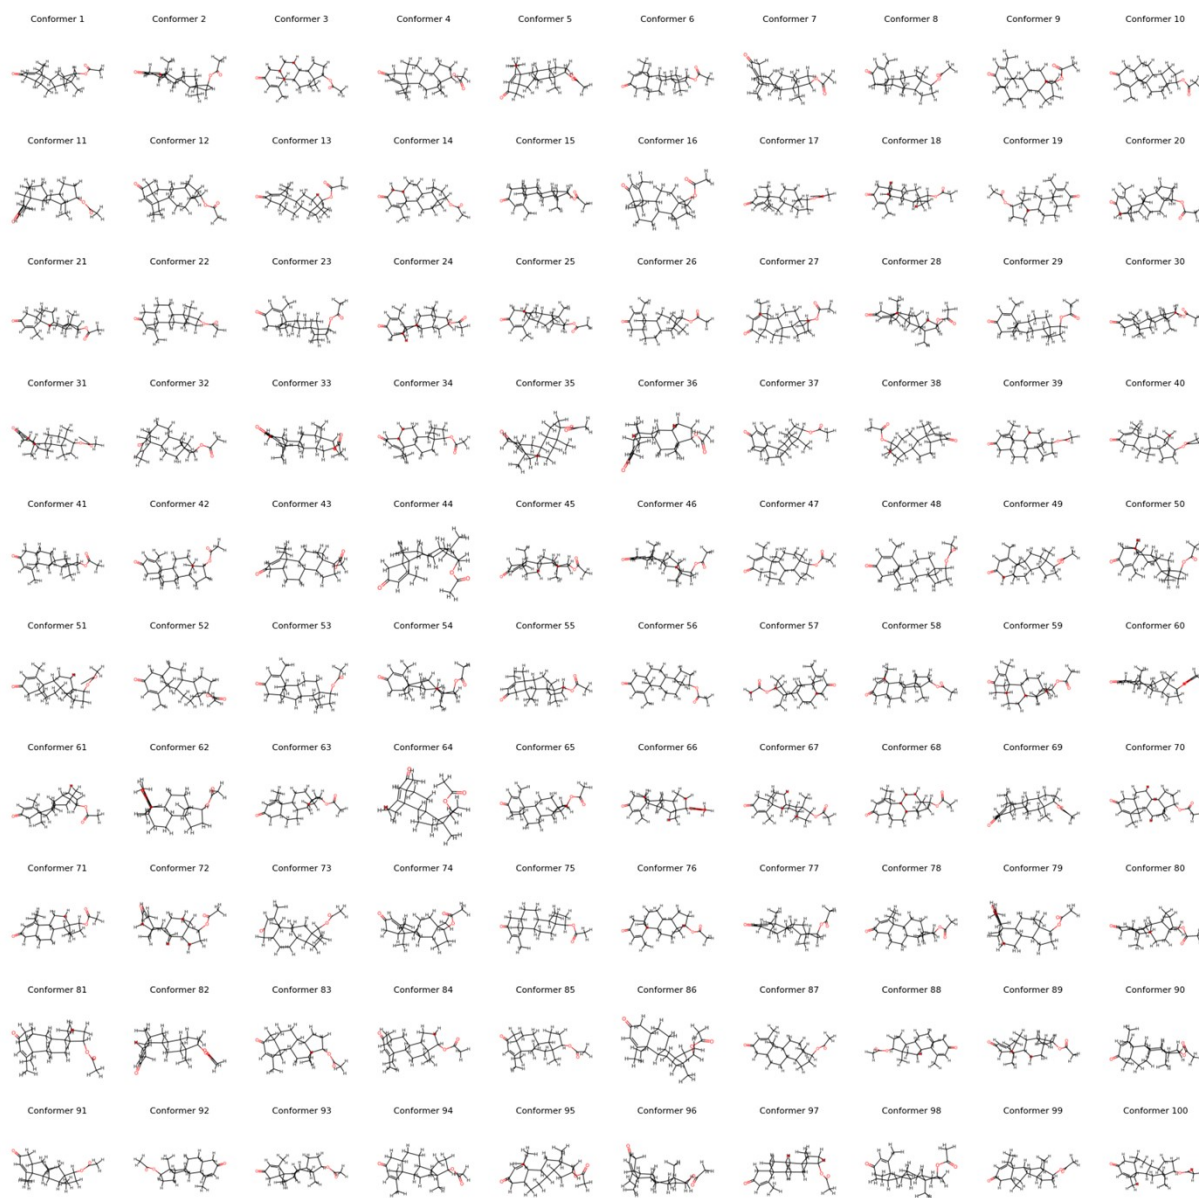

Energy Diagram of Methenolone Acetate

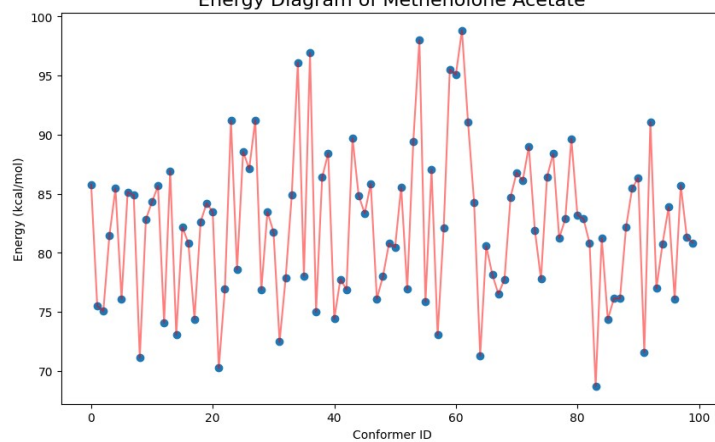

**Figure S6.**

*Analysis of*

*Conformational*

*Compound 3*

**Figure S7. Conformational Analysis of Compound 4**

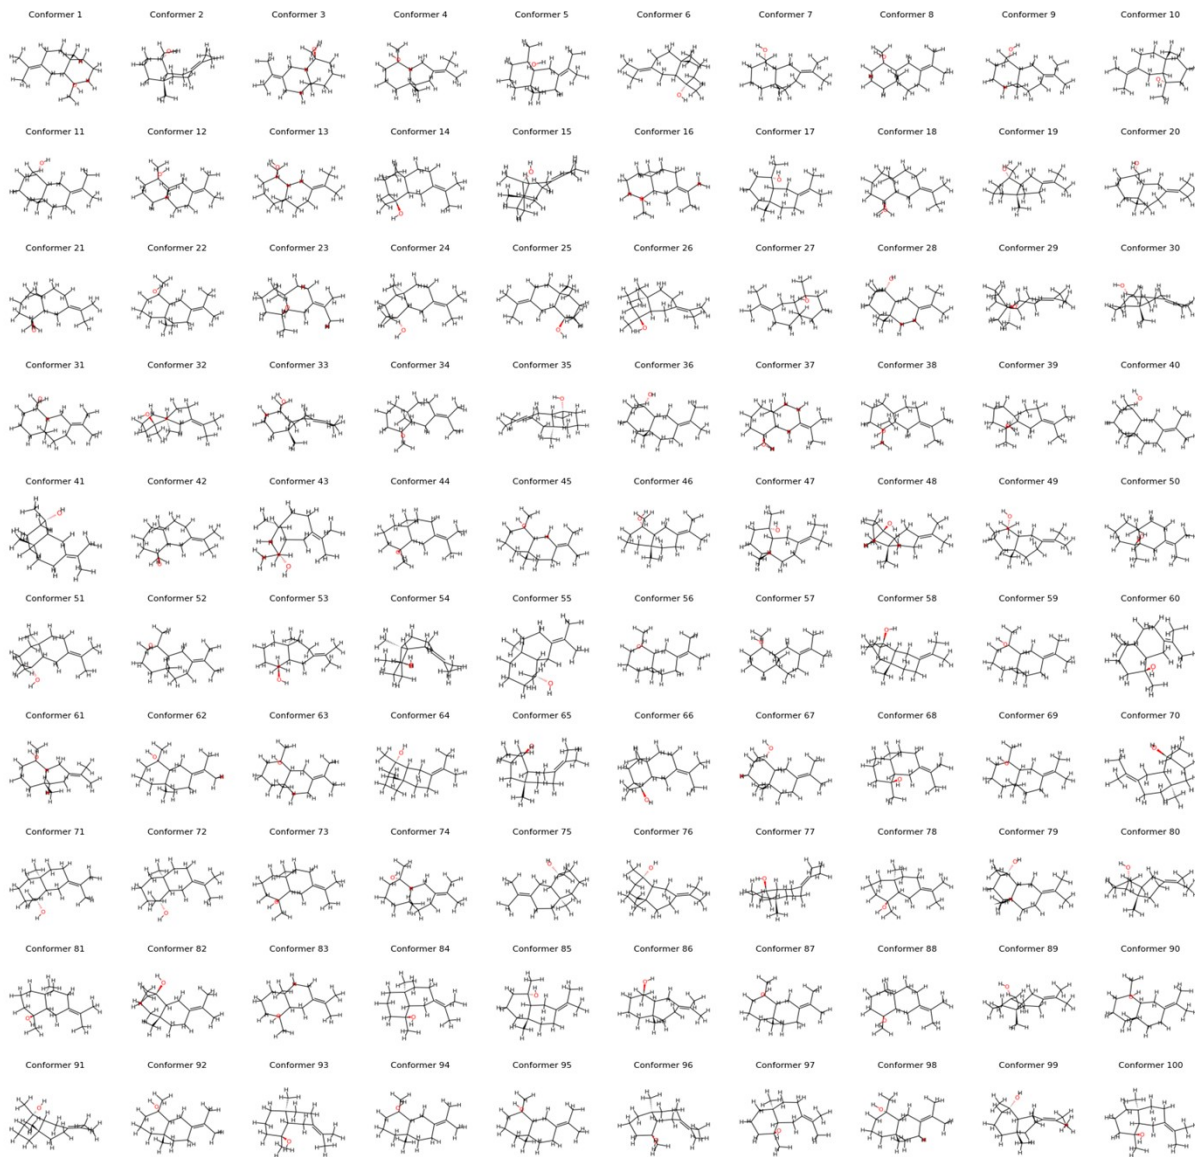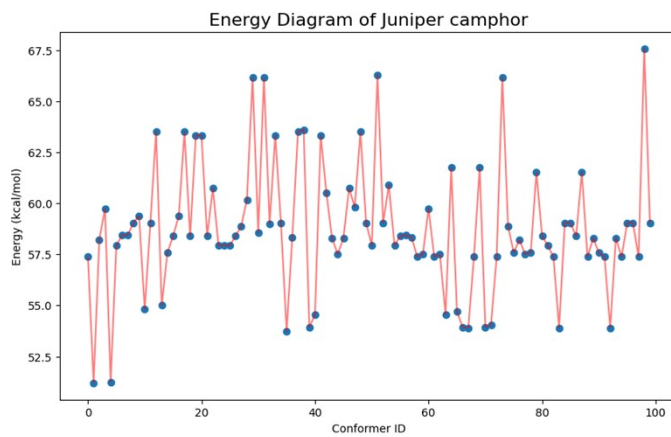



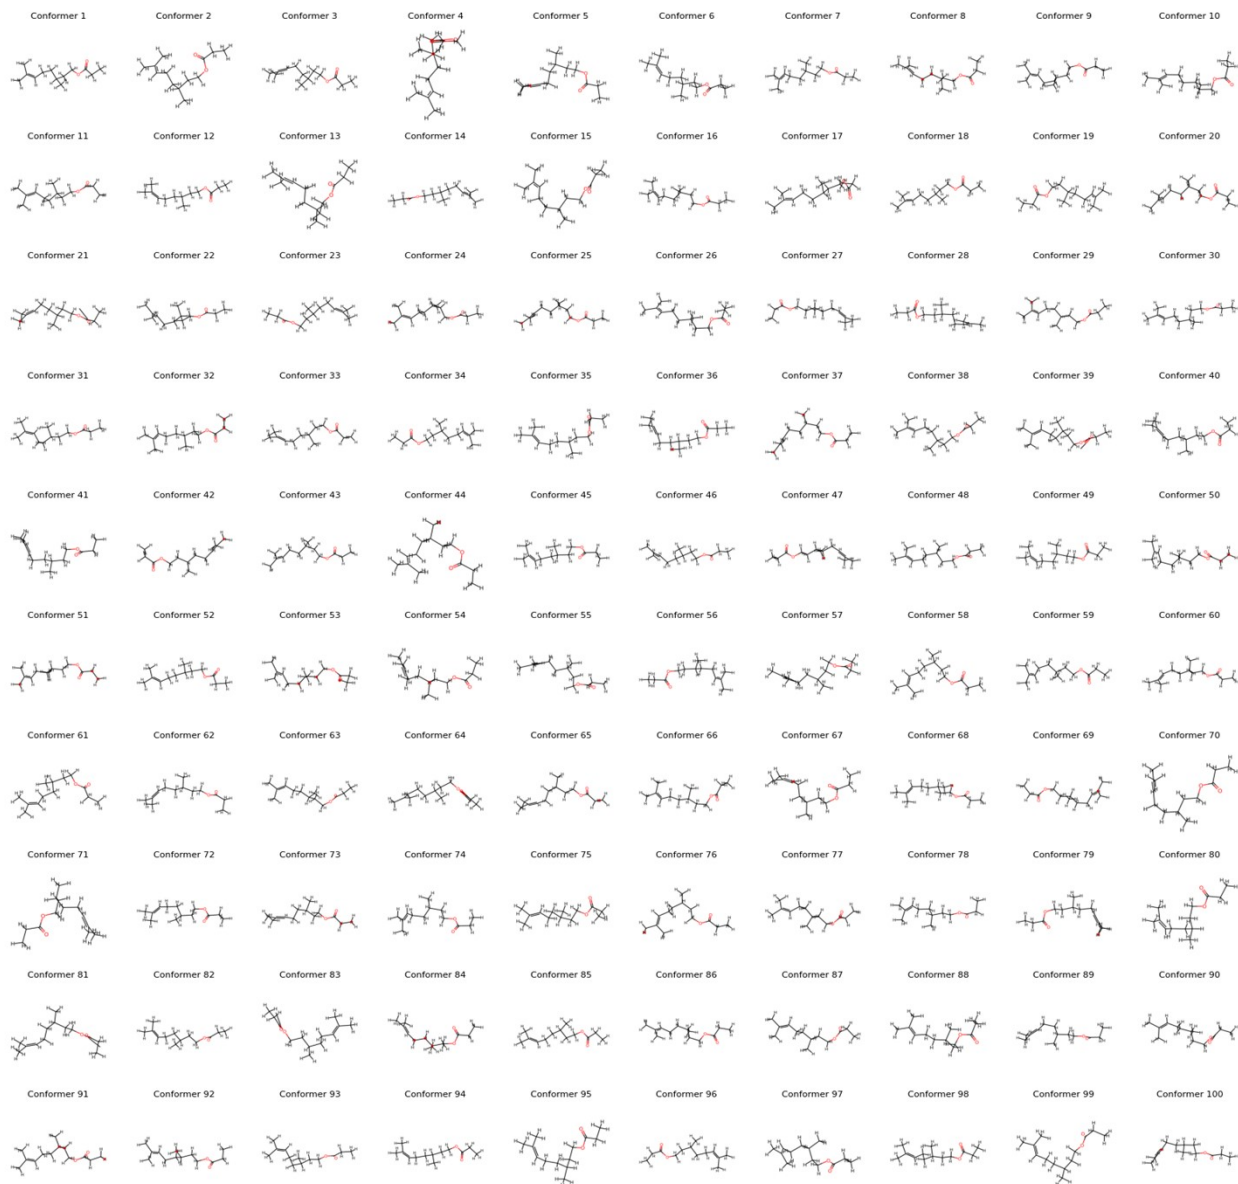

**Figure S8.** Conformational Analysis of Compound 5

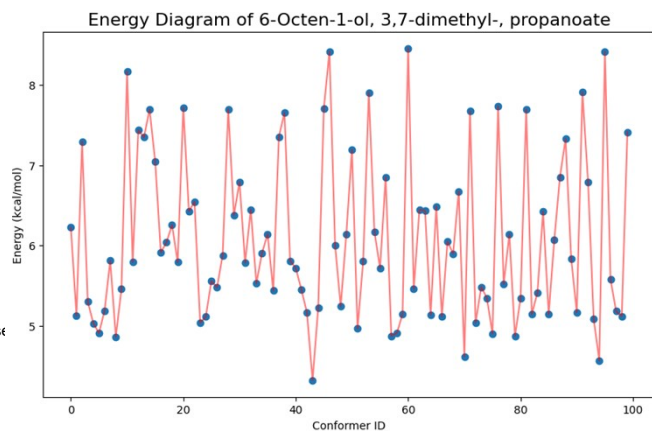

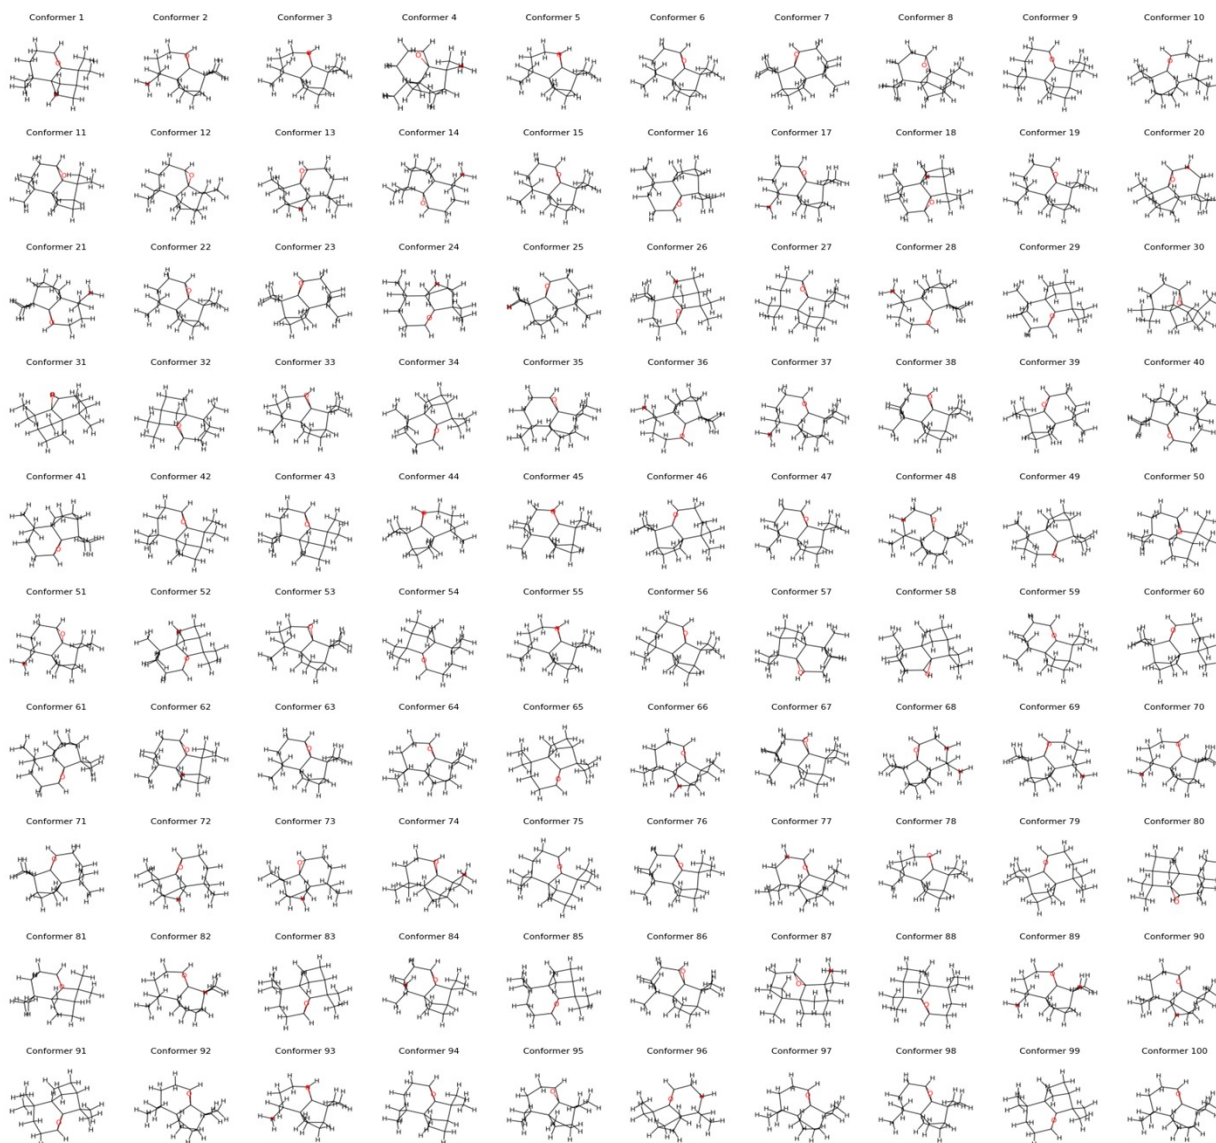

**Figure S9.** Conformational Analysis of Compound 6

Energy Diagram of 4a,7-Methano-4aH-naphth[1,8a-b]oxirene, octahydro-4,4,8,8-tetramethyl-

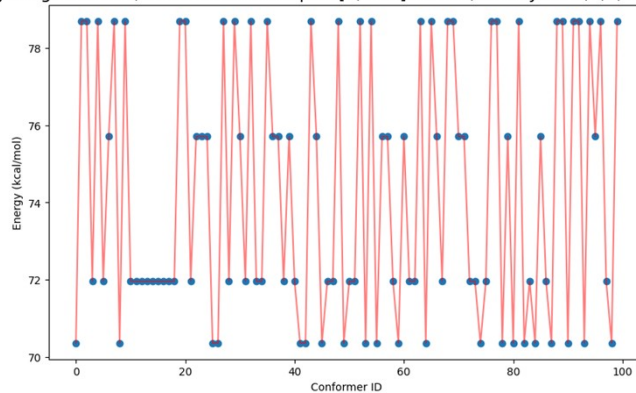

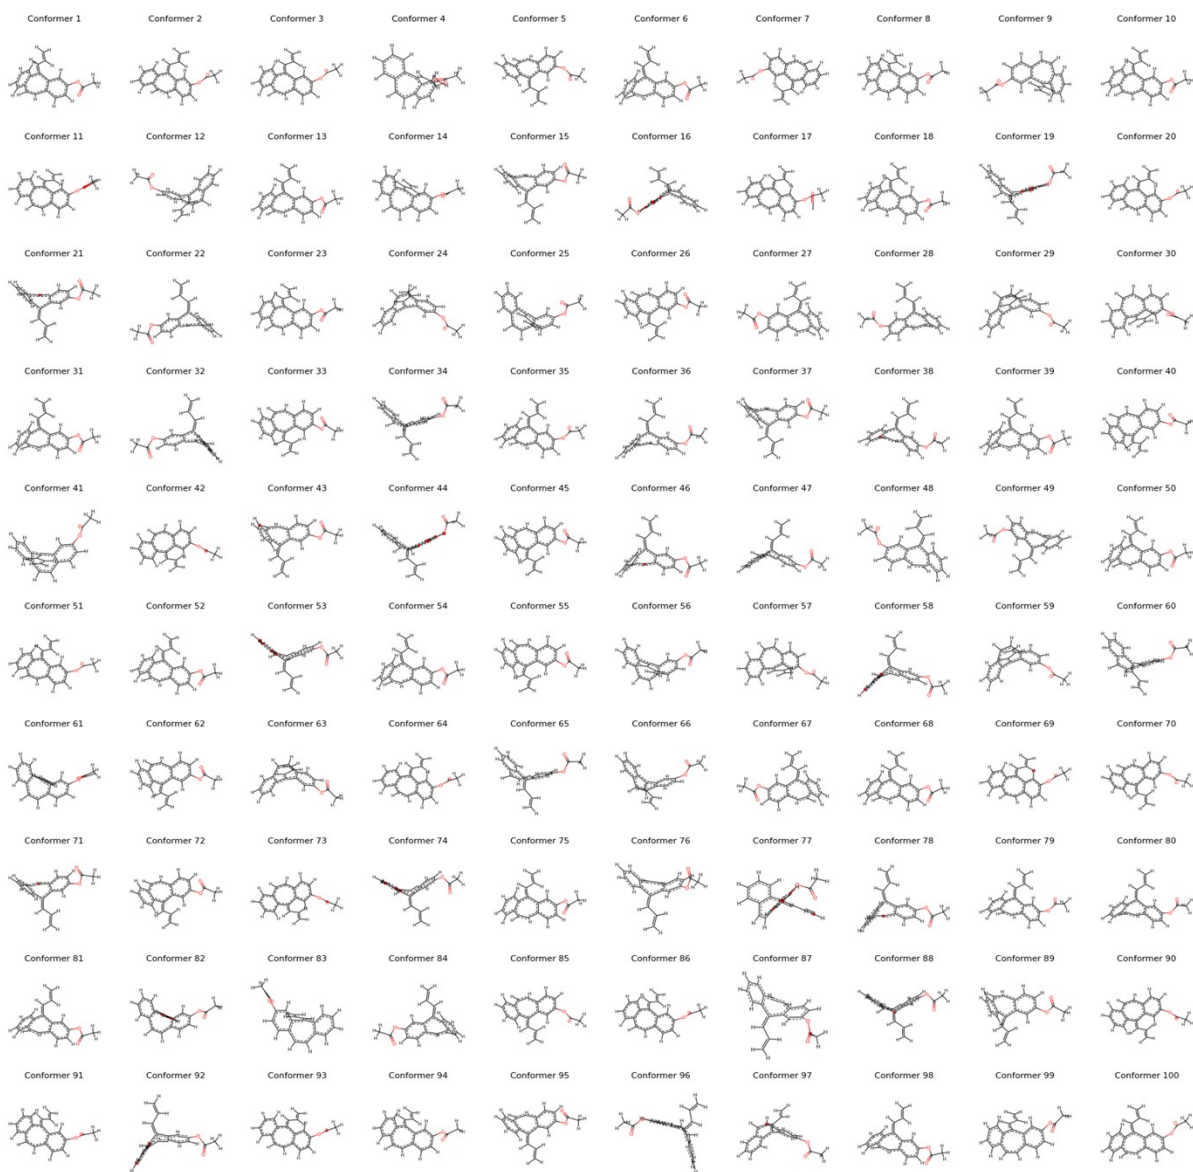

**Figure S10.** Conformational Analysis of Compound 7

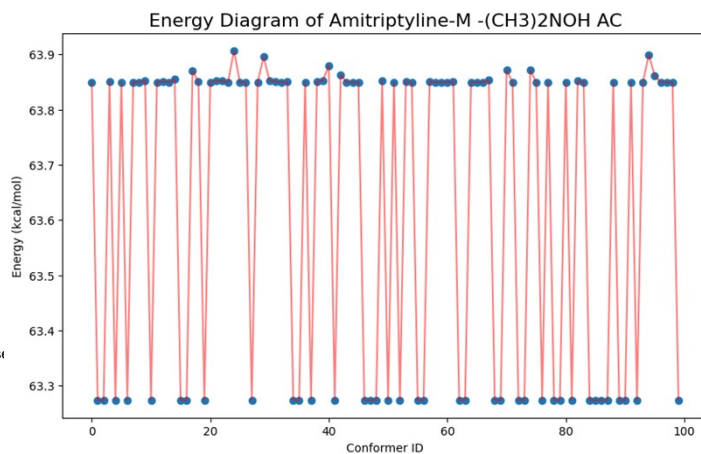

| Active Site | Mode | Compound # |         |      |         |      |         |      |         |      |         |      |         |      |         |
|-------------|------|------------|---------|------|---------|------|---------|------|---------|------|---------|------|---------|------|---------|
|             |      | 1          |         | 2    |         | 3    |         | 4    |         | 5    |         | 6    |         | 7    |         |
|             |      | Vina       | Vinardo | Vina | Vinardo | Vina | Vinardo | Vina | Vinardo | Vina | Vinardo | Vina | Vinardo | Vina | Vinardo |
| II          | 1    | -6.5       | -6.1    | -6.8 | -6.0    | -7.6 | -6.8    | -6.0 | -5.3    | -4.7 | -5.6    | -5.7 | -4.8    | -7.2 | -6.6    |
|             | 2    | -6.4       | -6.0    | -6.6 | -5.7    | -7.2 | -5.9    | -5.8 | -5.0    | -4.7 | -5.0    | -5.6 | -4.6    | -6.8 | -6.6    |
|             | 3    | -5.9       | -5.9    | -6.5 | -5.6    | -6.4 | -4.6    | -5.7 | -4.8    | -4.6 | -4.8    | -5.5 | -4.4    | -6.7 | -6.3    |
|             | 4    | -5.8       | -5.7    | -6.4 | -5.2    | -6.3 | -3.1    | -5.6 | -4.7    | -4.6 | -4.8    | -5.3 | -3.5    | -6.8 | -6.2    |
|             | 5    | -5.8       | -5.6    | -6.4 | -5.1    | -6.3 | -3.1    | -5.6 | -4.7    | -4.4 | -4.6    | -5.1 | -3.3    | -6.1 | -5.6    |
|             | 6    | -5.6       | -5.4    | -6.4 | -5.0    | -6.2 | -2.9    | -5.6 | -4.0    | -4.4 | -4.4    | -4.8 | -3.2    | -    | -       |
|             | 7    | -5.6       | -4.4    | -6.3 | -5.0    | -6.2 | -       | -5.4 | -3.6    | -4.3 | -4.4    | -4.6 | -3.2    | -    | -       |
|             | 8    | -5.5       | -4.2    | -6.2 | -4.5    | -6.1 | -       | -5.2 | -3.5    | -4.3 | -4.3    | -    | -3.1    | -    | -       |
|             | 9    | -4.5       | -       | -5.7 | -3.8    | -    | -       | -    | -3.3    | -4.2 | -4.2    | -    | -3.0    | -    | -       |
|             | 10   | -3.7       | -       | -4.4 | -3.0    | -    | -       | -    | -3.1    | -4.2 | -       | -    | -2.8    | -    | -       |
| III         | 1    | -5.5       | -4.8    | -6.6 | -4.8    | -7.9 | -5.7    | -5.2 | -4.1    | -4.9 | -3.5    | -5.3 | -3.9    | -6.9 | -4.4    |
|             | 2    | -5.4       | -4.6    | -6.1 | -4.5    | -6.6 | -4.6    | -5.2 | -4.0    | -4.8 | -3.0    | -5.2 | -3.3    | -6.5 | -4.3    |
|             | 3    | -5.3       | -4.3    | -5.6 | -4.3    | -6.2 | -4.5    | -5.0 | -3.9    | -4.7 | -3.0    | -5.0 | -3.3    | -6.4 | -4.3    |
|             | 4    | -5.2       | -4.2    | -5.6 | -4.3    | -6.1 | -4.4    | -4.9 | -3.7    | -4.7 | -2.9    | -4.9 | -3.2    | -6.3 | -4.1    |
|             | 5    | -5.1       | -3.9    | -5.5 | -4.2    | -5.5 | -4.4    | -4.8 | -3.6    | -4.4 | -2.8    | -4.8 | -3.2    | -6.0 | -4.1    |
|             | 6    | -5.1       | -3.8    | -5.5 | -4.0    | -5.5 | -4.4    | -4.7 | -3.6    | -4.2 | -2.8    | -4.8 | -3.1    | -5.9 | -4.1    |
|             | 7    | -4.8       | -3.6    | -5.3 | -3.9    | -5.2 | -4.3    | -4.7 | -3.5    | -4.2 | -2.8    | -4.8 | -2.9    | -5.7 | -4.1    |
|             | 8    | -4.6       | -3.6    | -5.2 | -3.9    | -5.1 | -4.3    | -4.6 | -3.4    | -4.1 | -2.8    | -4.8 | -2.8    | -5.6 | -4.0    |
|             | 9    | -4.5       | -3.5    | -5.2 | -3.8    | -5.0 | -4.2    | -4.5 | -3.3    | -3.9 | -2.8    | -4.6 | -2.8    | -5.5 | -4.0    |
|             | 10   | -4.4       | -3.4    | -5.2 | -3.6    | -4.9 | -4.0    | -4.5 | -3.2    | -3.9 | -2.5    | -4.6 | -2.8    | -5.3 | -3.9    |
| V           | 1    | -5.6       | -4.4    | -7.0 | -6.1    | -7.0 | -5.8    | -6.4 | -5.3    | -4.7 | -4.3    | -5.0 | -3.8    | -6.8 | -6.1    |
|             | 2    | -5.5       | -4.4    | -6.7 | -5.7    | -6.9 | -5.6    | -6.0 | -5.0    | -4.6 | -4.0    | -4.9 | -3.5    | -6.6 | -6.0    |
|             | 3    | -5.3       | -4.3    | -6.7 | -5.6    | -6.6 | -5.3    | -5.3 | -4.5    | -4.5 | -4.0    | -4.8 | -3.5    | -6.5 | -6.0    |
|             | 4    | -5.2       | -4.3    | -6.6 | -5.5    | -6.6 | -5.1    | -5.2 | -4.4    | -4.3 | -4.0    | -4.7 | -3.4    | -6.3 | -5.9    |
|             | 5    | -5.2       | -4.2    | -6.6 | -5.5    | -6.3 | -5.0    | -5.2 | -4.3    | -4.3 | -3.9    | -4.7 | -3.4    | -6.2 | -5.7    |
|             | 6    | -5.1       | -4.2    | -6.5 | -5.5    | -6.3 | -5.0    | -5.0 | -4.2    | -4.3 | -3.9    | -4.6 | -3.3    | -6.0 | -5.7    |
|             | 7    | -5.1       | -4.1    | -6.5 | -5.4    | -6.2 | -4.9    | -5.0 | -4.1    | -4.3 | -3.8    | -4.5 | -3.3    | -5.9 | -5.6    |
|             | 8    | -5.1       | -4.1    | -6.4 | -5.2    | -6.4 | -4.9    | -4.9 | -4.0    | -4.3 | -3.8    | -4.4 | -3.3    | -5.8 | -5.6    |
|             | 9    | -5.1       | -4.0    | -6.3 | -5.1    | -6.0 | -4.7    | -4.9 | -4.0    | -4.2 | -3.7    | -4.4 | -3.1    | -5.7 | -5.5    |
|             | 10   | -5.0       | -4.0    | -6.2 | -5.0    | -6.0 | -4.6    | -4.6 | -4.0    | -4.2 | -3.7    | -4.4 | -3.0    | -5.6 | -5.3    |

**Table S6. CFIXa Docking Scores**

**Table S7. Conformational Changes on Best Ligand-Complex per Bioactive Compound in CFIXa**

| Compound # | Vina Score | Vinardo Score | Active Site | Bond Length (Å)        |         |         | Bond Angle (Å) |                        |            |            |                 |  |
|------------|------------|---------------|-------------|------------------------|---------|---------|----------------|------------------------|------------|------------|-----------------|--|
|            |            |               |             | Atom                   | $l_i$   | $l_r$   | $\Delta l$     | Atom                   | $\angle_i$ | $\angle_r$ | $\Delta \angle$ |  |
| 1          | -6.5       | -6.1          | II          | H:TYR99                |         |         |                |                        |            |            |                 |  |
|            |            |               |             | CG - CD1               | 1.39556 | 1.39549 | -0.00007       | $\alpha$ (CD1-CG-CD2)  | 118.05     | 118.05     | 0               |  |
|            |            |               |             | CG - CD2               | 1.38966 | 1.38993 | 0.00027        | $\alpha$ (CG-CD2-CE2)  | 121.11     | 121.12     | 0.01            |  |
|            |            |               |             | CD1 - CE1              | 1.39409 | 1.39403 | -0.00006       | $\alpha$ (CD2-CE2-CZ)  | 119.59     | 119.57     | -0.02           |  |
|            |            |               |             | CD2 - CE2              | 1.39517 | 1.39501 | -0.00016       | $\alpha$ (CE2-CZ-CE1)  | 120.23     | 120.23     | 0               |  |
|            |            |               |             | CE1 - CZ               | 1.37854 | 1.37844 | -0.00010       | $\alpha$ (CZ-CE1-CD1)  | 119.64     | 119.67     | 0.03            |  |
|            |            |               |             | CE2 - CZ               | 1.38939 | 1.38949 | 0.00010        | $\alpha$ (CE1-CD1-CG)  | 121.24     | 121.21     | -0.03           |  |
|            |            |               |             | H:TRP215               |         |         |                |                        |            |            |                 |  |
|            |            |               |             | CD2 - CE2              | 1.41412 | 1.41425 | 0.00013        | $\alpha$ (CE3-CD2-CE2) | 118.63     | 118.63     | 0               |  |
|            |            |               |             | CD2 - CE3              | 1.39553 | 1.39532 | -0.00021       | $\alpha$ (CD2-CE2-CZ2) | 122.34     | 122.36     | 0.02            |  |
|            |            |               |             | CE2 - CZ2              | 1.411   | 1.41021 | -0.00079       | $\alpha$ (CE2-CZ2-CH2) | 117.54     | 117.55     | 0.01            |  |
|            |            |               |             | CE3 - CZ3              | 1.39216 | 1.39257 | 0.00041        | $\alpha$ (CZ2-CH2-CZ3) | 120.93     | 120.92     | -0.01           |  |
|            |            |               |             | CZ2 - CH2              | 1.3775  | 1.37761 | 0.00011        | $\alpha$ (CH2-CZ3-CE3) | 121.18     | 121.20     | 0.02            |  |
| CZ3 - CH2  | 1.40946    | 1.40908       | -0.00038    | $\alpha$ (CZ3-CE3-CD2) | 119.30  | 119.27  | -0.03          |                        |            |            |                 |  |
| 2          | -7.0       | -6.1          | V           | L:PHE98                |         |         |                |                        |            |            |                 |  |
|            |            |               |             | CG - CD1               | 1.39561 | 1.39508 | -0.000530      | $\alpha$ (CD1-CG-CD2)  | 118.35     | 118.36     | 0.01            |  |
|            |            |               |             | CG - CD2               | 1.38125 | 1.38094 | -0.000310      | $\alpha$ (CG-CD2-CE2)  | 120.93     | 120.94     | 0.01            |  |
|            |            |               |             | CD1 - CE1              | 1.40154 | 1.40109 | -0.000450      | $\alpha$ (CD2-CE2-CZ)  | 120.20     | 120.19     | -0.01           |  |
|            |            |               |             | CD2 - CE2              | 1.39071 | 1.39084 | 0.000130       | $\alpha$ (CE2-CZ-CE1)  | 119.86     | 119.84     | -0.02           |  |
|            |            |               |             | CE1 - CZ               | 1.37139 | 1.37223 | 0.000840       | $\alpha$ (CZ-CE1-CD1)  | 119.83     | 119.83     | 0               |  |
|            |            |               |             | CE2 - CZ               | 1.38619 | 1.38583 | -0.000360      | $\alpha$ (CE1-CD1-CG)  | 120.79     | 120.80     | 0.01            |  |
|            |            |               |             | L:LYS100               |         |         |                |                        |            |            |                 |  |
|            |            |               |             | CB - CG                | 1.51808 | 1.51855 | 0.000470       | $\alpha$ (CB-CG-CD)    | 110.42     | 110.41     | -0.01           |  |
|            |            |               |             | CG - CD                | 1.51948 | 1.51874 | -0.000740      |                        |            |            |                 |  |
| CE - NZ    | 1.49714    | 1.49794       | 0.000800    | $\alpha$ (CE-NZ-HZ1)   | 109.30  | 109.30  | 0              |                        |            |            |                 |  |
| HZ1 - NZ   | 1.01014    | 1.00985       | -0.000290   |                        |         |         |                |                        |            |            |                 |  |
| 3          | -7.6       | -6.8          | II          | H:TYR99                |         |         |                |                        |            |            |                 |  |
|            |            |               |             | CG - CD1               | 1.39556 | 1.39531 | -0.000250      | $\alpha$ (CD1-CG-CD2)  | 118.05     | 118.05     | 0               |  |
| CG - CD2   | 1.38966    | 1.39003       | 0.000370    | $\alpha$ (CG-CD2-CE2)  | 121.11  | 121.11  | 0              |                        |            |            |                 |  |

|   |      |      |    |           |         |         |           |                        |        |        |       |
|---|------|------|----|-----------|---------|---------|-----------|------------------------|--------|--------|-------|
|   |      |      |    | CD1 - CE1 | 1.39409 | 1.39417 | 0.000080  | $\alpha$ (CD2-CE2-CZ)  | 119.59 | 119.53 | -0.06 |
|   |      |      |    | CD2 - CE2 | 1.39517 | 1.39534 | 0.000170  | $\alpha$ (CE2-CZ-CE1)  | 120.23 | 120.27 | 0.04  |
|   |      |      |    | CE1 - CZ  | 1.37854 | 1.37766 | -0.000880 | $\alpha$ (CZ-CE1-CD1)  | 119.64 | 119.66 | 0.02  |
|   |      |      |    | CE2 - CZ  | 1.38939 | 1.38953 | 0.000140  | $\alpha$ (CE1-CD1-CG)  | 121.24 | 121.22 | -0.02 |
|   |      |      |    | H:TRP215  |         |         |           |                        |        |        |       |
|   |      |      |    | CG - CD1  | 1.36247 | 1.3615  | -0.000970 | $\alpha$ (CE3-CD2-CE2) | 118.63 | 118.67 | 0.04  |
|   |      |      |    | CG - CD2  | 1.44127 | 1.44155 | 0.000280  | $\alpha$ (CD2-CE2-CZ2) | 122.34 | 122.33 | -0.01 |
|   |      |      |    | CD1 - NE1 | 1.37831 | 1.37861 | 0.000300  | $\alpha$ (CE2-CZ2-CH2) | 117.54 | 117.55 | 0.01  |
|   |      |      |    | CD2 - CE2 | 1.41412 | 1.41369 | -0.000430 | $\alpha$ (CZ2-CH2-CZ3) | 120.93 | 120.94 | 0.01  |
|   |      |      |    | NE1 - CE2 | 1.37471 | 1.37452 | -0.000190 | $\alpha$ (CH2-CZ3-CE3) | 121.18 | 121.17 | -0.01 |
|   |      |      |    | CD2 - CE3 | 1.39553 | 1.3958  | 0.000270  | $\alpha$ (CZ3-CE3-CD2) | 119.30 | 119.26 | -0.04 |
|   |      |      |    | CE2 - CZ2 | 1.411   | 1.41062 | -0.000380 | $\alpha$ (CE2-CD2-CG)  | 107.19 | 107.18 | -0.01 |
|   |      |      |    | CE3 - CZ3 | 1.39216 | 1.39215 | -0.000010 | $\alpha$ (CD2-CG-CD1)  | 106.27 | 106.26 | -0.01 |
|   |      |      |    | CZ2 - CH2 | 1.3775  | 1.37728 | -0.000220 | $\alpha$ (CG-CD1-NE1)  | 110.25 | 110.29 | 0.04  |
|   |      |      |    | CZ3 - CH2 | 1.40946 | 1.4098  | 0.000340  | $\alpha$ (CD1-NE1-CE2) | 109.01 | 108.97 | -0.04 |
|   |      |      |    | HE1 - NE1 | 1.00952 | 1.00894 | -0.000580 | $\alpha$ (NE1-CE2-CD2) | 107.23 | 107.25 | 0.02  |
|   |      |      |    | H:TYR128  |         |         |           |                        |        |        |       |
|   |      |      |    | CG - CD1  | 1.39175 | 1.39183 | 0.000080  | $\alpha$ (CD1-CG-CD2)  | 118.01 | 118    | -0.01 |
|   |      |      |    | CG - CD2  | 1.3885  | 1.38838 | -0.000120 | $\alpha$ (CG-CD2-CE2)  | 121.21 | 121.19 | -0.02 |
|   |      |      |    | CD1 - CE1 | 1.39351 | 1.39339 | -0.000120 | $\alpha$ (CD2-CE2-CZ)  | 119.57 | 119.63 | 0.06  |
|   |      |      |    | CD2 - CE2 | 1.39727 | 1.39715 | -0.000120 | $\alpha$ (CE2-CZ-CE1)  | 120.29 | 120.25 | -0.04 |
| 4 | -6.4 | -5.3 | V  | CE1 - CZ  | 1.38569 | 1.38633 | 0.000640  | $\alpha$ (CZ-CE1-CD1)  | 119.38 | 119.36 | -0.02 |
|   |      |      |    | CE2 - CZ  | 1.38262 | 1.3824  | -0.000220 | $\alpha$ (CE1-CD1-CG)  | 121.43 | 121.47 | 0.04  |
|   |      |      |    | H:ILE129B |         |         |           |                        |        |        |       |
|   |      |      |    | CB - CG1  | 1.53349 | 1.53338 | -0.000110 | $\alpha$ (CD1-CG1-CB)  | 114.11 | 114.10 | -0.01 |
|   |      |      |    | CB - CG2  | 1.54926 | 1.54956 | 0.000300  | $\alpha$ (CG1-CB-CG2)  | 112.14 | 112.09 | -0.05 |
|   |      |      |    | CG1 - CD1 | 1.57649 | 1.57657 | 0.000080  |                        |        |        |       |
|   |      |      |    | H:TYR99   |         |         |           |                        |        |        |       |
|   |      |      |    | CG - CD1  | 1.39556 | 1.39527 | -0.000290 | $\alpha$ (CD1-CG-CD2)  | 118.05 | 118.08 | 0.03  |
|   |      |      |    | CG - CD2  | 1.38966 | 1.38882 | -0.000840 | $\alpha$ (CG-CD2-CE2)  | 121.11 | 121.12 | 0.01  |
|   |      |      |    | CD1 - CE1 | 1.39409 | 1.39521 | 0.001120  | $\alpha$ (CD2-CE2-CZ)  | 119.59 | 119.54 | -0.05 |
| 5 | -4.7 | -5.6 | II | CD2 - CE2 | 1.39517 | 1.39589 | 0.000720  | $\alpha$ (CE2-CZ-CE1)  | 120.23 | 120.27 | 0.04  |
|   |      |      |    | CE1 - CZ  | 1.37854 | 1.37795 | -0.000590 | $\alpha$ (CZ-CE1-CD1)  | 119.64 | 119.64 | 0     |
|   |      |      |    | CE2 - CZ  | 1.38939 | 1.38904 | -0.000350 | $\alpha$ (CE1-CD1-CG)  | 121.24 | 121.19 | -0.05 |
|   |      |      |    | H:TRP215  |         |         |           |                        |        |        |       |

|   |      |      |    |           |          |          |           |                        |        |        |       |
|---|------|------|----|-----------|----------|----------|-----------|------------------------|--------|--------|-------|
|   |      |      |    | CD2 - CE2 | 1.41412  | 1.41369  | -0.000430 | $\alpha$ (CE3-CD2-CE2) | 118.63 | 118.65 | 0.02  |
|   |      |      |    | CD2 - CE3 | 1.39553  | 1.39571  | 0.000180  | $\alpha$ (CD2-CE2-CZ2) | 122.34 | 122.29 | -0.05 |
|   |      |      |    | CE2 - CZ2 | 1.411    | 1.41166  | 0.000660  | $\alpha$ (CE2-CZ2-CH2) | 117.54 | 117.57 | 0.03  |
|   |      |      |    | CE3 - CZ3 | 1.39216  | 1.393    | 0.000840  | $\alpha$ (CZ2-CH2-CZ3) | 120.93 | 120.95 | 0.02  |
|   |      |      |    | CZ2 - CH2 | 1.3775   | 1.37717  | -0.000330 | $\alpha$ (CH2-CZ3-CE3) | 121.18 | 121.15 | -0.03 |
|   |      |      |    | CZ3 - CH2 | 1.40946  | 1.40887  | -0.000590 | $\alpha$ (CZ3-CE3-CD2) | 119.30 | 119.30 | 0     |
|   |      |      |    | H:TYR99   |          |          |           |                        |        |        |       |
|   |      |      |    | CG - CD1  | 1.39556  | 1.39634  | 0.000780  | $\alpha$ (CD1-CG-CD2)  | 118.05 | 117.99 | -0.06 |
|   |      |      |    | CG - CD2  | 1.38966  | 1.38971  | 0.000050  | $\alpha$ (CG-CD2-CE2)  | 121.11 | 121.14 | 0.03  |
|   |      |      |    | CD1 - CE1 | 1.39409  | 1.39403  | -0.000060 | $\alpha$ (CD2-CE2-CZ)  | 119.59 | 119.30 | -0.29 |
|   |      |      |    | CD2 - CE2 | 1.39517  | 1.39488  | -0.000290 | $\alpha$ (CE2-CZ-CE1)  | 120.23 | 120.23 | 0     |
|   |      |      |    | CE1 - CZ  | 1.37854  | 1.37858  | 0.000040  | $\alpha$ (CZ-CE1-CD1)  | 119.64 | 119.63 | -0.01 |
|   |      |      |    | CE2 - CZ  | 1.38939  | 1.38915  | -0.000240 | $\alpha$ (CE1-CD1-CG)  | 121.24 | 121.26 | 0.02  |
| 6 | -5.7 | -4.8 | II | H:TRP215  |          |          |           |                        |        |        |       |
|   |      |      |    | CD2 - CE2 | 1.41412  | 1.41467  | 0.000550  | $\alpha$ (CE3-CD2-CE2) | 118.63 | 118.61 | -0.02 |
|   |      |      |    | CD2 - CE3 | 1.39553  | 1.39476  | -0.000770 | $\alpha$ (CD2-CE2-CZ2) | 122.34 | 122.31 | -0.03 |
|   |      |      |    | CE2 - CZ2 | 1.411    | 1.41127  | 0.000270  | $\alpha$ (CE2-CZ2-CH2) | 117.54 | 117.54 | 0     |
|   |      |      |    | CE3 - CZ3 | 1.39216  | 1.39205  | -0.000110 | $\alpha$ (CZ2-CH2-CZ3) | 120.93 | 120.95 | 0.02  |
|   |      |      |    | CZ2 - CH2 | 1.3775   | 1.37681  | -0.000690 | $\alpha$ (CH2-CZ3-CE3) | 121.18 | 121.16 | -0.02 |
|   |      |      |    | CZ3 - CH2 | 1.40946  | 1.40937  | -0.000090 | $\alpha$ (CZ3-CE3-CD2) | 119.30 | 119.33 | 0.03  |
|   |      |      |    | H:TYR99   |          |          |           |                        |        |        |       |
|   |      |      |    | CG - CD1  | 1.39556  | 1.39527  | -0.000290 | $\alpha$ (CD1-CG-CD2)  | 118.05 | 118.06 | 0.01  |
|   |      |      |    | CG - CD2  | 1.38966  | 1.3897   | 0.000040  | $\alpha$ (CG-CD2-CE2)  | 121.11 | 121.08 | -0.03 |
|   |      |      |    | CD1 - CE1 | 1.39409  | 1.39499  | 0.000900  | $\alpha$ (CD2-CE2-CZ)  | 119.59 | 119.60 | 0.01  |
|   |      |      |    | CD2 - CE2 | 1.39517  | 1.39539  | 0.000220  | $\alpha$ (CE2-CZ-CE1)  | 120.23 | 120.25 | 0.02  |
|   |      |      |    | CE1 - CZ  | 1.37854  | 1.3782   | -0.000340 | $\alpha$ (CZ-CE1-CD1)  | 119.64 | 119.59 | -0.05 |
|   |      |      |    | CE2 - CZ  | 1.38939  | 1.38977  | 0.000380  | $\alpha$ (CE1-CD1-CG)  | 121.24 | 121.27 | 0.03  |
|   |      |      |    | CZ - OH   | 1.37181  | 1.3714   | -0.000410 | $\alpha$ (CE1-CZ-OH)   | 118.89 | 118.88 | -0.01 |
| 7 | -7.2 | -6.6 | II | HH - OH   | 0.959771 | 0.959907 | 0.000136  | $\alpha$ (CZ-OH-HH)    | 106.98 | 107.04 | 0.06  |

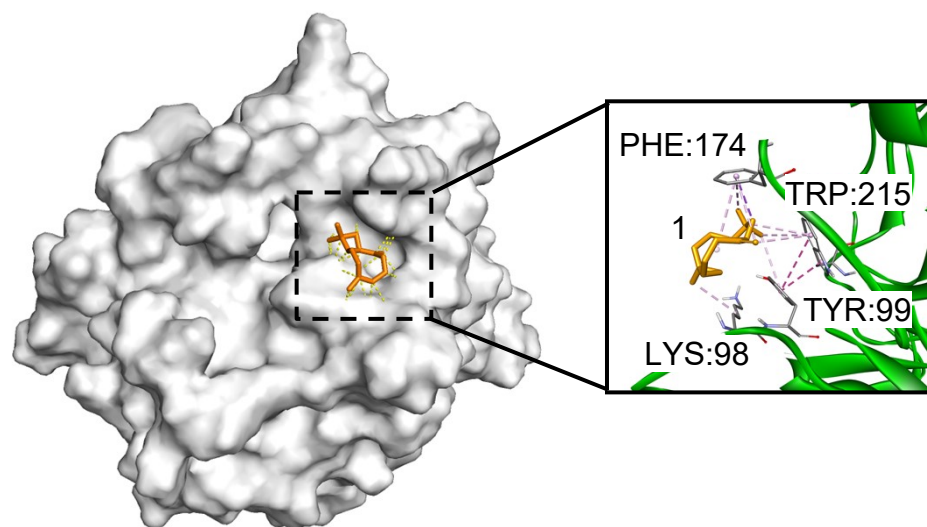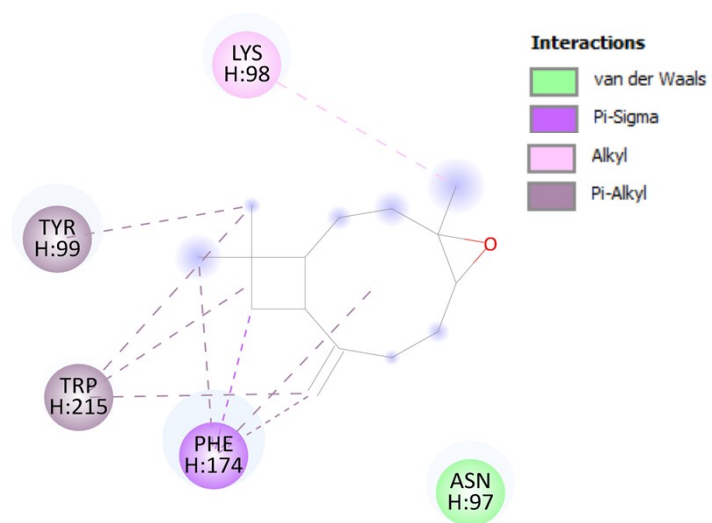

**Figure S11.**  
*Compound 1 Best Binding Mode on CFIXa at Active Site II*

**Figure S12.** *Compound 4 Best Binding Mode on CFIXa at Active Site V*



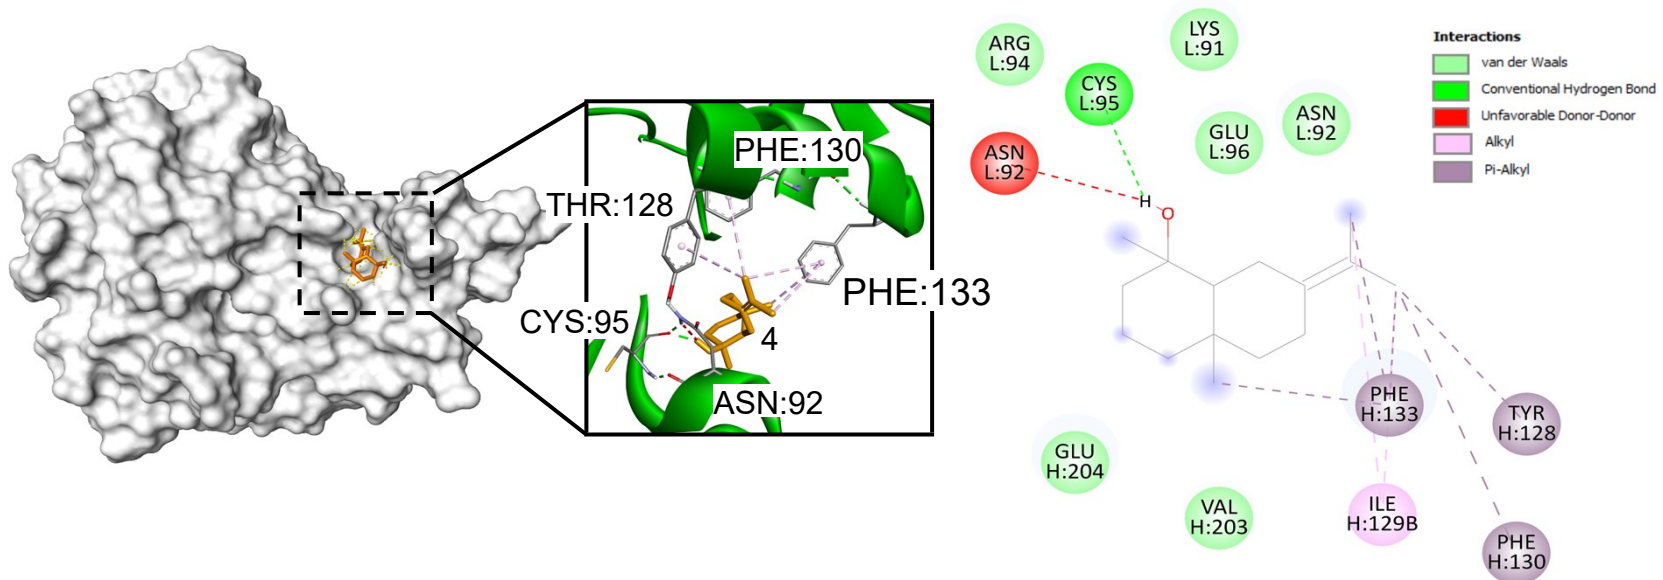

*S13. Compound 5 Best Binding Mode on CFIXa at Active Site II*

**Figure**

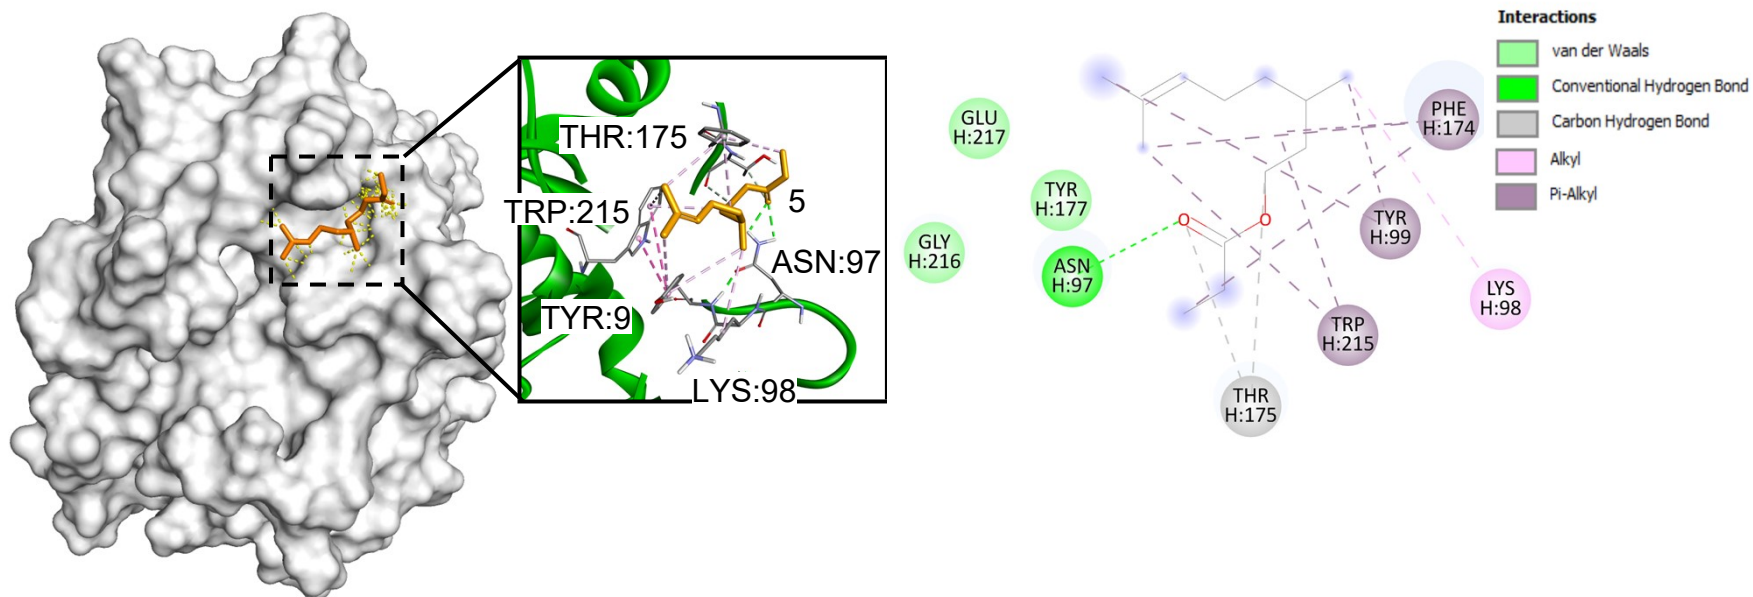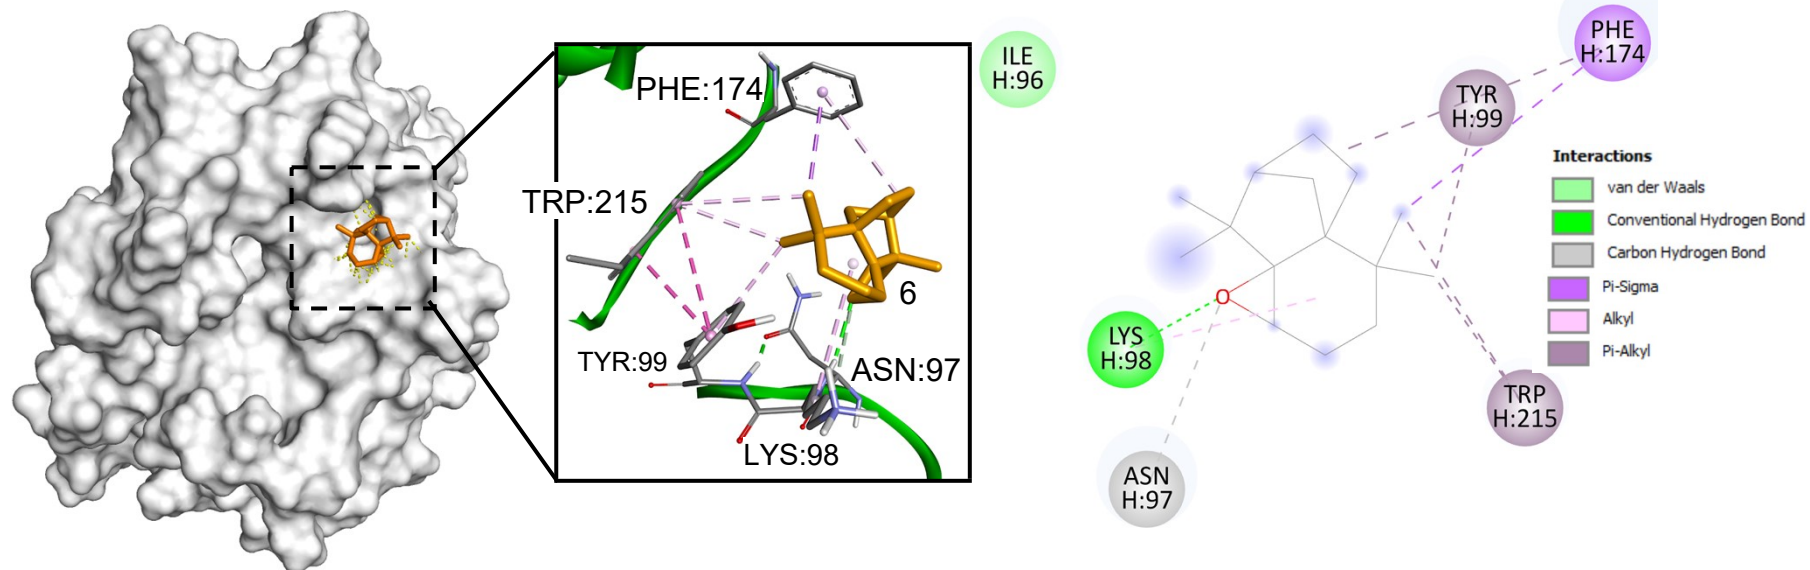

**Figure S14.** Compound 6 Best Binding Mode on CFXa at Active Site V
